# Supplementary material for: Nephroplex: a kidney-focused NGS panel highlights the challenges of PKD1 sequencing and identifies a founder BBS4 mutation
Source: Springer Nature journal article supplement (doi:10.1007/s40620-021-01048-4), 2021-05-08
Supplement: MOESM1 [file 19630494]

CLUSTAL 2.1 multiple sequence alignment

```
PKD1P2 -----
PKD1P5 -----
PKD1      GCACTGCAGCGCCAGCGTCCGAGCGGGCGGCCGAGCTCCCGGAGCGGCCTGGCCCCGAGC
PKD1P4 -----
PKD1P1 -----
PKD1P3 -----
PKD1P6 -----

PKD1P5 -----GCTCAGCAGAGGTCGCGGCCGAGCCCCATCCAGCCCCGCGCCG
PKD1      CCCGAGCGGGCGTTCGCTCAGCAGAGGTCGCGGCCGAGCCCCATCCAGCCCCGCGCCG
PKD1P4 -----
PKD1P1 -----
PKD1P3 -----GCTCAGCAGAGGTCGCGGCCGAGCCCCATCCAGCCCCGCGCCG
PKD1P6 -----

PKD1P2 -----
PKD1P5      CCATGCCGTCCGCCGGCCCCGCCTGAGCCGCGGGCTCCGCGCGGGCGGGCCCTGGGGAC
PKD1      CCATGCCGTCCGCCGGCCCCGCCTGAGCTGCGGCCTCCGCGCGGGCGGGCCCTGGGGAC
PKD1P4 -----
PKD1P1 -----
PKD1P3      CCATGCCGTCCGCCGGCCCCGCCTGAGCCGCGGGCTCCGCGCGGGCGGGCCCTGGGGAC
PKD1P6 -----

PKD1P2 -----
PKD1P5      GGC GGGCCATGCGCGCGCTGCCCTAACGATGCCGCCCGCCGCCGCCCGCCCTGGCGC
PKD1      GGC GGGCCATGCGCGCGCTGCCCTAACGATGCCGCCCGCCGCCGCCCGCCCTGGCGC
PKD1P4 -----
PKD1P1 -----ATGCCGCCCGCCGCCGCCCGCCCTGGCGC
PKD1P3      GGC GGGCCATGCGCGCGCTGCCCTAACGATGCCGCCCGCCGCCGCCCGCCCTGGCGC
PKD1P6 -----

PKD1P2 -----
PKD1P5      TGGCCCTGGGCCTGGGCCTGTGGCTCGGGCGCTGGCGGGGGCCCCGGGCGCGGCTGCG
PKD1      TGGCCCTGGGCCTGGGCCTGTGGCTCGGGCGCTGGCGGGGGCCCCGGGCGCGGCTGCG
PKD1P4 -----
PKD1P1      TGGCCCTGGGCCTGGGCCTGTGGCTCGGGCGCTGGCGGGGGCCCCGGGCGCGGCTGCG
PKD1P3      TGGCCCTGGGCCTGGGCCTGTGGCTCGGGCGCTGGCGGGGGCCCCGGGCGCGGCTGCG
PKD1P6 -----

PKD1P2 -----
PKD1P5      GGCCTTGCGAGCCCCCTGCCTCTGCGGCCTAGCGCCCGCGCCGCTGCCCGTCAACT
PKD1P4 -----
PKD1P1 -----
PKD1P3 -----
PKD1P6 -----

PKD1P2 -----
PKD1P5      GCTCGGGCCGCGGGCCGCGGGCTGCGGACGCTCGGTCCC GCGCTGCGCATCCCCGCGGAC
PKD1      GCTCGGGCCGCGGGC-----TGC GACGCTCGGTCCC GCGCTGCGCATCCCCGCGGAC
PKD1P4 -----
PKD1P1      GCTCGGGCCGCGGGCCGCGGGCTGCGGACGCTCGGTCCC GCGCTGCGCATCCCCGCGGAC
PKD1P3      GCTCGGGCCGCGGGCCGCGGGCTGCGGACGCTCGGTCCC GCGCTGCGCATCCCCGCGGAC
PKD1P6 -----

PKD1P2 -----AGACGCTCTCCACAACTGCTCCGGGCGCTGGACGTTGGGCTCCTGGCG
PKD1P5      GCCACAGCGCTAGACGCTCTCCACAACTGCTCCGGGCGCTGGACGTTGGGCTCCTGGCG
PKD1      GCCACAGCGCTAGACGCTCTCCACAACTGCTCCGGGCGCTGGACGTTGGGCTCCTGGCG
PKD1P4 -----AGACGCTCTCCACAACTGCTCCGGGCGCTGGACGTTGGGCTCCTGGCG
PKD1P1      GCCACAGCGCTAGACGCTCTCCACAACTGCTCCGGGCGCTGGACGTTGGGCTCCTGGCG
PKD1P3      GCCACAGCGCTAGACGCTCTCCACAACTGCTCCGGGCGCTGGACGTTGGGCTCCTGGCG
PKD1P6 -----

PKD1P2      AACCTCTCGGCACTGGCAGAGCTGGATATAAGCAACAACAAGATTTCTACGTTAGAAGAA
PKD1P5      AACCTCTCGGCGCTGGCAGAGCTGGATATAAGCAACAACAAGATTTCTACGTTAGAAGAA
PKD1      AACCTCTCGGCGCTGGCAGAGCTGGATATAAGCAACAACAAGATTTCTACGTTAGAAGAA
PKD1P4      AACCTCTCGGCGCTGGCAGAGCTGGATATAAGCAACAACAAGATTTCTACGTTAGAAGAA
PKD1P1      AACCTCTCGGCGCTGGCAGAGCTGGATATAAGCAACAACAAGATTTCTACGTTAGAAGAA
PKD1P3      AACCTCTCGGCGCTGGCAGAGCTGGATATAAGCAACAACAAGATTTCTACGTTAGAAGAA
PKD1P6 -----

PKD1P2      GGAATATTTGCTAATTTATTTAATTTAAGTGAAATAAACCTGAGTGGGAACCCGTTTGAG
PKD1P5      GGAATATTTGCTAATTTATTTAATTTAAGTGAAATAAACCTGAGTGGGAACCCGTTTGAG
PKD1      GGAATATTTGCTAATTTATTTAATTTAAGTGAAATAAACCTGAGTGGGAACCCGTTTGAG
PKD1P4      GGAATATTTGCTAATTTATTTAATTTAAGTGAAATAAACCTGAGTGGGAACCCGTTTGAG
PKD1P1      GGAATATTTGCTAATTTATTTAATTTAAGTGAAATAAACCTGAGTGGGAACCCGTTTGAG
PKD1P3      GGAATATTTGCTAATTTATTTAATTTAAGTGAAATAAACCTGAGTGGGAACCCGTTTGAG
PKD1P6 -----

PKD1P2      TGTGACTGTGGCCTGGCGTGGCTGCCCGCATGGGCGGAGGAGCAGAGGTGCGGGTGGTG
PKD1P5      TGTGACTGTGGCCTGGCGTGGCTGCCCGCATGGGCGGAGGAGCAGAGGTGCGGGTGGTG
PKD1      TGTGACTGTGGCCTGGCGTGGCTGCCCGCATGGGCGGAGGAGCAGAGGTGCGGGTGGTG
PKD1P4      TGTGACTGTGGCCTGGCGTGGCTGCCCGCATGGGCGGAGGAGCAGAGGTGCGGGTGGTG
PKD1P1      TGTGACTGTGGCCTGGCGTGGCTGCCCGCATGGGCGGAGGAGCAGAGGTGCGGGTGGTG
PKD1P3      TGTGACTGTGGCCTGGCGTGGCTGCCCGCATGGGCGGAGGAGCAGAGGTGCGGGTGGTG
PKD1P6 -----
```

PKD1P6 -----  
  
PKD1P2 CAGCCCGAGGCAGCCACGTGTGCTGGGCCTGGCTCCCTGGCTGGCCAGCCTCTGCTTGGC  
PKD1P5 CAGCCCGAGGCAGCCACGTGTGCTGGGCCTGGCTCCCTGGCTGGCCAGCCTCTGCTTGGC  
PKD1 CAGCCCGAGGCAGCCACGTGTGCTGGGCCTGGCTCCCTGGCTGGCCAGCCTCTGCTTGGC  
PKD1P4 CAGCCCGAGGCAGCCACGTGTGCTGGGCCTGGCTCCCTGGCTGGCCAGCCTCTGCTTGGC  
PKD1P1 CAGCCCGAGGCAGCCACGTGTGCTGGGCCTGGCTCCCTGGCTGGCCAGCCTCTGCTTGGC  
PKD1P3 CAGCCCGAGGCAGCCACGTGTGCTGGGCCTGGCTCCCTGGCTGGCCAGCCTCTGCTTGGC  
PKD1P6 -----

PKD1P2 ATCCCTTGTCTGGACAGTGGCTGTGGTGAGGAGTATGTCGCCTGCCTCCCTGACAACAGC  
PKD1P5 ATCCCTTGTCTGGACAGTGGCTGTGGTGAGGAGTATGTCGCCTGCCTCCCTGACAACAGC  
PKD1 ATCCCTTGTCTGGACAGTGGCTGTGGTGAGGAGTATGTCGCCTGCCTCCCTGACAACAGC  
PKD1P4 ATCCCTTGTCTGGACAGTGGCTGTGGTGAGGAGTATGTCGCCTGCCTCCCTGACAACAGC  
PKD1P1 ATCCCTTGTCTGGACAGTGGCTGTGGTGAGGAGTATGTCGCCTGCCTCCCTGACAACAGC  
PKD1P3 ATCCCTTGTCTGGACAGTGGCTGTGGTGAGGAGTATGTCGCCTGCCTCCCTGACAACAGC  
PKD1P6 -----

PKD1P2 TCAGGCACCGTGGCAGCAGTGTCTTTTTTCAGCTGCCCACGAAGGCCTGCTTCAGCCAGAG  
PKD1P5 TCAGGCACCGTGGCAGCAGTGTCTTTTTTCAGCTGCCCACGAAGGCCTGCTTCAGCCAGAG  
PKD1 TCAGGCACCGTGGCAGCAGTGTCTTTTTTCAGCTGCCCACGAAGGCCTGCTTCAGCCAGAG  
PKD1P4 TCAGGCACCGTGGCAGCAGTGTCTTTTTTCAGCTGCCCACGAAGGCCTGCTTCAGCCAGAG  
PKD1P1 TCAGGCACCGTGGCAGCAGTGTCTTTTTTCAGCTGCCCACGAAGGCCTGCTTCAGCCAGAG  
PKD1P3 TCAGGCACCGTGGCAGCAGTGTCTTTTTTCAGCTGCCCACGAAGGCCTGCTTCAGCCAGAG  
PKD1P6 -----

PKD1P2 GCCTGCAGCGCCTTCTGCTTCTCCACCGGCCAGGGCCTCGCAGCCCTCTCCGAGCAGGGC  
PKD1P5 GCCTGCAGCGCCTTCTGCTTCTCCACCGGCCAGGGCCTCGCAGCCCTCTCCGAGCAGGGC  
PKD1 GCCTGCAGCGCCTTCTGCTTCTCCACCGGCCAGGGCCTCGCAGCCCTCTCCGAGCAGGGC  
PKD1P4 GCCTGCAGCGCCTTCTGCTTCTCCACCGGCCAGGGCCTCGCAGCCCTCTCCGAGCAGGGC  
PKD1P1 GCCTGCAGCGCCTTCTGCTTCTCCACCGGCCAGGGCCTCGCAGCCCTCTCCGAGCAGGGC  
PKD1P3 GCCTGCAGCGCCTTCTGCTTCTCCACCGGCCAGGGCCTCGCAGCCCTCTCCGAGCAGGGC  
PKD1P6 -----

PKD1P2 TGGTGCCTGTGTGGGTGAGCCAGCCCTCCAGTGCCTCCTTCGCCTGCCTGTCCCTCTGC  
PKD1P5 TGGTGCCTGTGTGGGTGAGCCAGCCCTCCAGTGCCTCCTTCGCCTGCCTGTCCCTCTGC  
PKD1 TGGTGCCTGTGTGGGTGAGCCAGCCCTCCAGTGCCTCCTTCGCCTGCCTGTCCCTCTGC  
PKD1P4 TGGTGCCTGTGTGGGTGAGCCAGCCCTCCAGTGCCTCCTTCGCCTGCCTGTCCCTCTGC  
PKD1P1 TGGTGCCTGTGTGGGTGAGCCAGCCCTCCAGTGCCTCCTTCGCCTGCCTGTCCCTCTGC  
PKD1P3 TGGTGCCTGTGTGGGTGAGCCAGCCCTCCAGTGCCTCCTTCGCCTGCCTGTCCCTCTGC  
PKD1P6 -----

PKD1P2 TCCGGCCCCCGCCGCTCCTGCCCCACCTGTAGGGGCCCCACCTCCTCCAGCACGTC

PKD1P5 TCCGGCCCCCGCCGCTCCTGCCCCACCTGTAGGGGCCCCACCTCCTCCAGCACGTC  
PKD1 TCCGGCCCCCGCCGCTCCTGCCCCACCTGTAGGGGCCCCACCTCCTCCAGCACGTC  
PKD1P4 TCCGGCCCCCGCCGCTCCTGCCCCACCTGTAGGGGCCCCACCTCCTCCAGCACGTC  
PKD1P1 TCCGGCCCCCGCCGCTCCTGCCCCACCTGTAGGGGCCCCACCTCCTCCAGCACGTC  
PKD1P3 TCCGGCCCCCGCCGCTCCTGCCCCACCTGTAGGGGCCCCACCTCCTCCAGCACGTC  
PKD1P6 -----

PKD1P2 TTCCCTGCCTCCCCAGGGGCCACCTGGTGGGGCCCCACGGACCCTGGCCTCCGGCCAG  
PKD1P5 TTCCCTGCCTCCCCAGGGGCCACCTGGTGGGGCCCCACGGACCCTGGCCTCCGGCCAG  
PKD1 TTCCCTGCCTCCCCAGGGGCCACCTGGTGGGGCCCCACGGACCCTGGCCTCCGGCCAG  
PKD1P4 TTCCCTGCCTCCCCAGGGGCCACCTGGTGGGGCCCCACGGACCCTGGCCTCCGGCCAG  
PKD1P1 TTCCCTGCCTCCCCAGGGGCCACCTGGTGGGGCCCCACGGACCCTGGCCTCCGGCCAG  
PKD1P3 TTCCCTGCCTCCCCAGGGGCCACCTGGTGGGGCCCCACGGACCCTGGCCTCCGGCCAG  
PKD1P6 -----

PKD1P2 CTAGCAGCCTTCCACATCGCTGCCCGCTCCTGTACTGCCACACGCTGGGACTTCGGA  
PKD1P5 CTAGCAGCCTTCCACATCGCTGCCCGCTCCTGTACTGCCACACGCTGGGACTTCGGA  
PKD1 CTAGCAGCCTTCCACATCGCTGCCCGCTCCTGTACTGCCACACGCTGGGACTTCGGA  
PKD1P4 CTAGCAGCCTTCCACATCGCTGCCCGCTCCTGTACTGCCACACGCTGGGACTTCGGA  
PKD1P1 CTAGCAGCCTTCCACATCGCTGCCCGCTCCTGTACTGCCACACGCTGGGACTTCGGA  
PKD1P3 CTAGCAGCCTTCCACATCGCTGCCCGCTCCTGTACTGCCACACGCTGGGACTTCGGA  
PKD1P6 -----

PKD1P2 GACGGCTCCCCGAGGTGGATGCCGCTGGGCCGGCTGCCTCGCATCGCTATGTGCTGCCT  
PKD1P5 GACGGCTCCCCGAGGTGGATGCCGCTGGGCCGGCTGCCTCGCATCGCTATGTGCTGCCT  
PKD1 GACGGCTCCCCGAGGTGGATGCCGCTGGGCCGGCTGCCTCGCATCGCTATGTGCTGCCT  
PKD1P4 GACGGCTCCCCGAGGTGGATGCCGCTGGGCCGGCTGCCTCGCATCGCTATGTGCTGCCT  
PKD1P1 GACGGCTCCCCGAGGTGGATGCCGCTGGGCCGGCTGCCTCGCATCGCTATGTGCTGCCT  
PKD1P3 GACGGCTCCCCGAGGTGGATGCCGCTGGGCCGGCTGCCTCGCATCGCTATGTGCTGCCT  
PKD1P6 -----

PKD1P2 GGGCGCTATCACGTGACGGCCGTGCTGGCCCTGGGGGCGGCTCAGCCCTGCTGGGGACA  
PKD1P5 GGGCGCTATCACGTGATGGCCGTGCTGGCCCTGGGGGCGGCTCAGCCCTGCTGGGGACA  
PKD1 GGGCGCTATCACGTGACGGCCGTGCTGGCCCTGGGGGCGGCTCAGCCCTGCTGGGGACA  
PKD1P4 GGGCGCTATCACGTGACGGCCGTGCTGGCCCTGGGGGCGGCTCAGCCCTGCTGGGGACA  
PKD1P1 GGGCGCTATCACGTGACGGCCGTGCTGGCCCTGGGGGCGGCTCAGCCCTGCTGGGGACA  
PKD1P3 GGGCGCTATCACGTGACGGCCGTGCTGGCCCTGGGGGCGGCTCAGCCCTGCTGGGGACA  
PKD1P6 -----

PKD1P2 GACGTGCAGGTGGAAGCGGCACCTGCCGCCCTGGAGCTCGTGTGCCCGTCTCGGTGCAG  
PKD1P5 GACGTGCAGGTGGAAGCGGCACCTGCCGCCCTGGAGCTCGTGTGCCCGTCTCGGTGCAG  
PKD1 GACGTGCAGGTGGAAGCGGCACCTGCCGCCCTGGAGCTCGTGTGCCCGTCTCGGTGCAG  
PKD1P4 GACGTGCAGGTGGAAGCGGCACCTGCCGCCCTGGAGCTCGTGTGCCCGTCTCGGTGCAG  
PKD1P1 GACGTGCAGGTGGAAGCGGCACCTGCCGCCCTGGAGCTCGTGTGCCCGTCTCGGTGCAG

PKD1P3 GACGTGCAGGTGGAAGCGGCACCTGCCGCCCTGAAGCTCGTGTGCCCGTCTCGGTGCAG  
PKD1P6 -----

PKD1P2 AGTGACGAGAGCCTCGACCTCAGCATCCAGAACCCTGTTGGTTTCAGGCCTGGAGGCCGCC  
PKD1P5 AGTGACGAGAGCCTCGACCTCAGCATCCAGAACCCTGTTGGTTTCAGGCCTGGAGGCCGCC  
PKD1 AGTGACGAGAGCCTCGACCTCAGCATCCAGAACCCTGTTGGTTTCAGGCCTGGAGGCCGCC  
PKD1P4 AGTGACGAGAGCCTCGACCTCAGCATCCAGAACCCTGTTGGTTTCAGGCCTGGAGGCCGCC  
PKD1P1 AGTGACGAGAGCCTCGACCTCAGCATCCAGAACCCTGTTGGTTTCAGGCCTGGAGGCCGCC  
PKD1P3 AGTGACGAGAGCCTCGACCTCAGCATCCAGAACCCTGTTGGTTTCAGGCCTGGAGGCCGCC  
PKD1P6 -----

PKD1P2 TACAGCATCGTGGCCCTGGGCGAGGAGCCGGCCGAGCGGTGCACCCGCTCTGCCCTCG  
PKD1P5 TACAGCATCGTGGCCCTGGGCGAGGAGCCGGCCGAGCGGTGCACCCGCTCTGCCCTCG  
PKD1 TACAGCATCGTGGCCCTGGGCGAGGAGCCGGCCGAGCGGTGCACCCGCTCTGCCCTCG  
PKD1P4 TACAGCATCGTGGCCCTGGGCGAGGAGCCGGCCGAGCGGTGCACCCGCTCTGCCCTCG  
PKD1P1 TACAGCATCGTGGCCCTGGGCGAGGAGCCGGCCGAGCGGTGCACCCGCTCTGCCCTCG  
PKD1P3 TACAGCATCGTGGCCCTGGGCGAGGAGCCGGCCGAGCGGTGCACCCGCTCTGCCCTCG  
PKD1P6 -----

PKD1P2 GACACGGAGATCTTCTCTGGCAACGGGCACTGCTACCGCCTGGTGGTGGAGAAGGCGGCC  
PKD1P5 GACACGGAGATCTTCTCTGGCAACGGGCACTGCTACCGCCTGGTGGTGGAGAAGGCGGCC  
PKD1 GACACGGAGATCTTCCCTGGCAACGGGCACTGCTACCGCCTGGTGGTGGAGAAGGCGGCC  
PKD1P4 GACACGGAGATCTTCTCTGGCAATGGGCACTGCTACCGCCTGGTGGTGGAGAAGGCGGCC  
PKD1P1 GACACGGAGATCTTCTCTGGCAATGGGCACTGCTACCGCCTGGTGGTGGAGAAGGCGGCC  
PKD1P3 GACACGGAGATCTTCTCTGGCAATGGGCACTGCTACCGCCTGGTGGTGGAGAAGGCGGCC  
PKD1P6 -----

PKD1P2 TGGCTGCAGGCGCAGGAGCAGTGTCTGGCCCTGGGCCGGGGCCGCCCTGGCAATGGTGGAC  
PKD1P5 TGGCTGCAGGCGCAGGAGCAGTGTCTGGCCCTGGGCCGGGGCCGCCCTGGCAATGGTGGAC  
PKD1 TGGCTGCAGGCGCAGGAGCAGTGTCTGGCCCTGGGCCGGGGCCGCCCTGGCAATGGTGGAC  
PKD1P4 TGGCTGCAGGCGCAGGAGCAGTGTCTGGCCCTGGGCCGGGGCCACCCTGGCAATGGTGGAC  
PKD1P1 TGGCTGCAGGCGCAGGAGCAGTGTCTGGCCCTGGGCCGGGGCCACCCTGGCAATGGTGGAC  
PKD1P3 TGGCTGCAGGCGCAGGAGCAGTGTCTGGCCCTGGGCCGGGGCCACCCTGGCAATGGTGGAC  
PKD1P6 -----

PKD1P2 AGTCCCGCCGTGCAGCGCTTCTGGTCTCCCGGTTACCAGGAGCCTAGACATGTGGATC  
PKD1P5 AGTCCCGCCATGCAGCGCTTCTGGTCTCCCGGTTACCAGGAGCCTAGACATGTGGATC  
PKD1 AGTCCCGCCGTGCAGCGCTTCTGGTCTCCCGGTTACCAGGAGCCTAGACATGTGGATC  
PKD1P4 AGTCCCGCCGTGCAGCGCTTCTGGTCTCCCGGTTACCAGGAGCCTAGACATGTGGATC  
PKD1P1 AGTCCCGCCGTGCAGCGCTTCTGGTCTCCCGGTTACCAGGAGCCTAGACATGTGGATC  
PKD1P3 AGTCCCGCCGTGCAGCGCTTCTGGTCTCCCGGTTACCAGGAGCCTAGACATGTGGATC  
PKD1P6 -----

PKD1P2 GGCTTCTCGACTGTGCAGGGGGTGGAGGTGGGCCACGCCCGAGGGCGAGGCCTTCAGC  
PKD1P5 GGCTTCTCGACTGTGCAGGGGGTGGAGGTGGGCCACGCCCGAGGGCGAGGCCTTCAGC  
PKD1 GGCTTCTCGACTGTGCAGGGGGTGGAGGTGGGCCACGCCCGAGGGCGAGGCCTTCAGC  
PKD1P4 GGCTTCTCGACTGTGCAGGGGGTGGAGGTGGGCCACGCCCGAGGGCGAGGCCTTCAGC  
PKD1P1 GGCTTCTCGACTGTGCAGGGGGTGGAGGTGGGCCACGCCCGAGGGCGAGGCCTTCAGC  
PKD1P3 GGCTTCTCGACTGTGCAGGGGGTGGAGGTGGGCCACGCCCGAGGGCGAGGCCTTCAGC  
PKD1P6 -----

PKD1P2 CTGGAGAGCTGCCAGAACTGGCTGCCCGGGGAGCCACACCAGCCACAGCCGAGCACTGC  
PKD1P5 CTGGAGAGCTGCCAGAACTGGCTGCCCGGGGAGCCACACCAGCCACAGCCGAGCACTGC  
PKD1 CTGGAGAGCTGCCAGAACTGGCTGCCCGGGGAGCCACACCAGCCACAGCCGAGCACTGC  
PKD1P4 CTGGAGAGCTGCCAGAACTGGCTGCCCGGGGAGCCACACCAGCCACAGCCGAGCACTGC  
PKD1P1 CTGGAGAGCTGCCAGAACTGGCTGCCCGGGGAGCCACACCAGCCACAGCCGAGCACTGC  
PKD1P3 CTGGAGAGCTGCCAGAACTGGCTGCCCGGGGAGCCACACCAGCCACAGCTGAGCACTGC  
PKD1P6 -----

PKD1P2 GTCCGGCTCGGGCCCCACCGGGTGGTGTAAACCCGACCTGTGCTCAGCGCTGCACAGCTAC  
PKD1P5 GTCCGGCTCGGGCCCCACCGGGTGGTGTAAACCCGACCTGTGCTCAGCGCCGCACAGCTAC  
PKD1 GTCCGGCTCGGGCCCCACCGGGTGGTGTAAACCCGACCTGTGCTCAGCGCCGCACAGCTAC  
PKD1P4 GTCCGGCTCGGGCCCCACCGGGTGGTGTAAACCCGACCTGTGCTCAGCGCCGCACAGCTAC  
PKD1P1 GTCCGGCTCGGGCCCCACCGGGTGGTGTAAACCCGACCTGTGCTCAGCGCCGCACAGCTAC  
PKD1P3 GTCCGGCTCGGGCCCCACCGGGTGGTGTAAACCCGACCTGTGCTCAGCGCCGCACAGCTAC  
PKD1P6 -----

PKD1P2 GTCTGCGAGCTGCGGCCCTGGAGGCCAGTGCAGGATGCCGAGAACCCTCCTCGTGGGAGCG  
PKD1P5 GTCTGCGAGCTGCGGCCCTGGAGGCCAGTGCAGGATGCCGAGAACCCTCCTCGTGGGAGCG  
PKD1 GTCTGCGAGCTGCAGCCCGAGGCCAGTGCAGGATGCCGAGAACCCTCCTCGTGGGAGCG  
PKD1P4 GTCTGCGAGCTGCGGCCCTGGAGGCCAGTGCAGGATGCCGAGAACCCTCCTCGTGGGAGCG  
PKD1P1 GTCTGCGAGCTGCGGCCCTGGAGGCCAGTGCAGGATGCCGAGAACCCTCCTCGTGGGAGCG  
PKD1P3 GTCTGCGAGCTGCGGCCCTGGAGGCCAGTGCAGGATGCCGAGAACCCTCCTCGTGGGAGCG  
PKD1P6 -----

PKD1P2 CCCAGTGGGGACCTGCAGGGACCCCTGATGCCTCTGGCACGGCAGTACGGCCTCTCAGCC  
PKD1P5 CCCAGTGGGGACCTGCAGGGACCCCTGATGCCTCTGGCACGGCAGGACGGCCTCTCAGCC  
PKD1 CCCAGTGGGGACCTGCAGGGACCCCTGACGCCTCTGGCACAGCAGGACGGCCTCTCAGCC  
PKD1P4 CCCAGTGGGGACCTGTAGGGACCCCTGATGCCTCTGGCACGGCAGGACGGCCTCTCAGCC  
PKD1P1 CCCAGTGGGGACCTGTAGGGACCCCTGATGCCTCTGGCACGGCAGGACGGCCTCTCAGCC  
PKD1P3 CCCAGTGGGGACCTGTAGGGACCCCTGATGCCTCTGGCACGGCAGTACGGCCTCTCAGCC  
PKD1P6 -----

PKD1P2 CCGCATGAGCCCGTGGAGGTCATGGTATTCCCGGGCTGCGTCTGAGCCGTGAAGCCTTC  
PKD1P5 CCGCATGAGCCCGTGGAGGTCATGGTATTCCCGGGCTGCGTCTGAGCCGTGAAGCCTTC  
PKD1 CCGCACGAGCCCGTGGAGGTCATGGTATTCCCGGGCTGCGTCTGAGCCGTGAAGCCTTC  
PKD1P4 CCGCACGAGCCCGTGGAGGTCATGGTATTCCCGGGCTGCGTCTGAGCCGTGAAGCCTTC

PKD1P1 CCGCACGAGCCCCTGGAGGTCATGGTATTCCCGGGCCTGCGTCTGAGCCGTGAAGCCTTC  
PKD1P3 CCGCACGAGCCCCTGGAGGTCATGGTATTCCCGGGCCTGCGTCTGAGCCGTGAAGCCTTC  
PKD1P6 -----

PKD1P2 CTCACCACGGCCGAATTTGGGACCCAGGAGCTCCGGCGGCCCGCCAGCTGCGGCTGCAG  
PKD1P5 CTCACCACGGCCGAATTTGGGACCCAGGAGCTCCGGCGGCCCGCCAGCTGCGGCTGCAG  
PKD1 CTCACCACGGCCGAATTTGGGACCCAGGAGCTCCGGCGGCCCGCCAGCTGCGGCTGCAG  
PKD1P4 CTCACCACGGCCGAATTTGGGACCCAGGAGCTCCGGCGGCCCGCCAGCTGCGGCTGCAG  
PKD1P1 CTCACCACGGCCGAATTTGGGACCCAGGAGCTCCGGCGGCCCGCCAGCTGCGGCTGCAG  
PKD1P3 CTCACCACGGCCGAATTTGGGACCCAGGAGCTCCGGCGGCCCGCCAGCTGCGGCTGCAG  
PKD1P6 -----

c. 1864

PKD1P2 GTGTACCGGCTCCTCAGCACAGCAGGGACCCCGGAGAACGCAGCGAGCCTGAGAGCAGG  
PKD1P5 GTGTACCGCTCCTCAGCACAGCAGGGACCCCGGAGAACGCAGCGAGCCTGAGAGCAGG  
PKD1 GTGTACCGGCTCCTCAGCACAGCAGGGACCCCGGAGAACGCAGCGAGCCTGAGAGCAGG  
PKD1P4 GTGTACCGGCTCCTCAGCACAGCAGGGACCCCGGAGAACGCAGCGAGCCTGAGAGCAGG  
PKD1P1 GTGTACCGGCTCCTCAGCACAGCAGGGACCCCGGAGAACGCAGCGAGCCTGAGAGCAGG  
PKD1P3 GTGTACCGGCTCCTCAGCACAGCAGGGACCCCGGAGAACGCAGCGAGCCTGAGAGCAGG  
PKD1P6 -----

PKD1P2 TCCCCGACAACAGGACCCAGCTGGCCCCCGCGTGCATGCCAGGGGGACGCTGGTGCCCT  
PKD1P5 TCCCCGACAACAGGACCCAGCTGGCCCCCGCGTGCATGCCAGGGGGACGCTGGTGCCCT  
PKD1 TCCCCGACAACAGGACCCAGCTGGCCCCCGCGTGCATGCCAGGGGGACGCTGGTGCCCT  
PKD1P4 TCCCCGACAACAGGACCCAGCTGGTCCCCGCGTGCATGCCAGGGGGACGCTGGTGCCCT  
PKD1P1 TCCCCGACAACAGGACCCAGCTGGTCCCCGCGTGCATGCCAGGGGGACGCTGGTGCCCT  
PKD1P3 TCCCCGACAACAGGACCCAGCTGGTCCCCGCGTGCATGCCAGGGGGACGCTGGTGCCCT  
PKD1P6 -----

PKD1P2 GGAGCCAACATCTGCTTGCCGCTGGACGCTCCTGCCACCCC-AGGCCTGCGCCAATGGC  
PKD1P5 GGAGCCAACATCTGCTTGCCGCTGGACGCTCCTGCCACCCC-AGGCCTGCGCCAATGGC  
PKD1 GGAGCCAACATCTGCTTGCCGCTGGACGCTCCTGCCACCCCAGGCCTGCGCCAATGGC  
PKD1P4 GGAGCCAACATCTGCTTGCCGCTGGACGCTCCTGCCACCCCAGGCCTGCGCCAATGGC  
PKD1P1 GGAGCCAACATCTGCTTGCCGCTGGACGCTCCTGCCACCCCAGGCCTGCGCCAATGGC  
PKD1P3 GGAGCCAACATCTGCTTGCCGCTGGACGCTCCTGCCACCCCAGGCCTGCGCCAATGGC  
PKD1P6 -----

PKD1P2 TGCACGTGAGGGCCAGGGCTACTCGGGGCCCCATATGCGCTATGGAGAGAGTTCTCTTT  
PKD1P5 TGCACGTGAGGGCCAGGGCTACTCGGGGCCCCATATGCGCTATGGAGAGAGTTCTCTTT  
PKD1 TGCACGTGAGGG-CCAGGGCTACCCGGGCCCCATATGCGCTATGGAGAGAGTTCTCTTT  
PKD1P4 TGCACGTGAGGG-CCAGGGCTACTCGGGGCCCCATATGCGCTATGGAGAGAGTTCTCTTT  
PKD1P1 TGCACGTGAGGG-CCAGGGCTACTCGGGTCCCCATATGCGCTATGGAGAGAGTTCTCTTT  
PKD1P3 TGCACGTGAGGG-CCAGGGCTACTCGGGTCCCCATATGCGCTATGGAGAGAGTTCTCTTT  
PKD1P6 -----

PKD1P2 CTCCGTTCCCGGGGGCCCCCGCGCAGTACTCGGTACCCCTCCACGGCCAGGATGTCTCT  
PKD1P5 CTCCGTTCCCGGGGGCCCCCGCGCAGTACTCGGTACCCCTCCACGGCCAGGATGTCTCT  
PKD1 CTCCGTTCCCGGGGGCCCCCGCGCAGTACTCGGTACCCCTCCACGGCCAGGATGTCTCT  
PKD1P4 CTCCGTTCCCGGGGGCCCCCGCGCAGTACTCGGTACCCCTCCACGGCCAGGATGTCTCT  
PKD1P1 CTCCGTTCCCGGGGGCCCCCGCGCAGTACTCGGTACCCCTCCACGGCCAGGATGTCTCT  
PKD1P3 CTCCGTTCCCGGGGGCCCCCGCGCAGTACTCGGTACCCCTCCACGGCCAGGATGTCTCT  
PKD1P6 -----

PKD1P2 CATGCTCCCTGGTGACCTCGTTGGCTTGCAGCACGACGCTGGCCCTGGCGCCCTCCCGCA  
PKD1P5 CATGCTCCCTGGTGACCTCGTTGGCTTGCAGCACGACGCTGGCCCTGGCGCCCTCCCGCA  
PKD1 CATGCTCCCTGGTGACCTCGTTGGCTTGCAGCACGACGCTGGCCCTGGCGCCCTCCCGCA  
PKD1P4 CATGCTCCCTGGTGACCTCGTTGGCTTGCAGCACGACGCTGGCCCTGGCGCCCTCCCGCA  
PKD1P1 CATGCTCCCTGGTGACCTCGTTGGCTTGCAGCACGACGCTGGCCCTGGCGCCCTCCCGCA  
PKD1P3 CATGCTCCCTGGTGACCTCGTTGGCTTGCAGCACGACGCTGGCCCTGGCGCCCTCCCGCA  
PKD1P6 -----

PKD1P2 CTGCTCGCCGGCTCCCGGCCACCCTGGTCCCCAGGCCCGTACCTCTCCGCCAACGCCTC  
PKD1P5 CTGCTCGCCGGCTCCCGGCCACCCTGGTCCCCAGGCCCGTACCTCTCCGCCAACGCCTC  
PKD1 CTGCTCGCCGGCTCCCGGCCACCCTGGTCCCCAGGCCCGTACCTCTCCGCCAACGCCTC  
PKD1P4 CTGCTCGCCGGCTCCCGGCCACCCTGGTCCCCAGGCCCGTACCTCTCCGCCAACGCCTC  
PKD1P1 CTGCTCGCCGGCTCCCGGCCACCCTGGTCCCCAGGCCCGTACCTCTCCGCCAACGCCTC  
PKD1P3 CTGCTCGCCGGCTCCCGGCCACCCTGGTCCCCAGGCCCGTACCTCTCCGCCAACGCCTC  
PKD1P6 -----

PKD1P2 GTCATGGCTGCCCCACTTGCCAGCCCAGCTGGAGGGCACTTGGGCCTGCCCTGCCTGTGC  
PKD1P5 GTCATGGCTGCCCCACTTGCCAGCCCAGCTGGAGGGCACTTGGGCCTGCCCTGCCTGTGC  
PKD1 GTCATGGCTGCCCCACTTGCCAGCCCAGCTGGAGGGCACTTGGGCCTGCCCTGCCTGTGC  
PKD1P4 GTCATGGCTGCCCCACTTGCCAGCCCAGCTGGAGGGCACTTGGGCCTGCCCTGCCTGTGC  
PKD1P1 GTCATGGCTGCCCCACTTGCCAGCCCAGCTGGAGGGCACTTGGGCCTGCCCTGCCTGTGC  
PKD1P3 GTCATGGCTGCCCCACTTGCCAGCCCAGCTGGAGGGCACTTGGGCCTGCCCTGCCTGTGC  
PKD1P6 -----

PKD1P2 CCTGCGGCTGCTTGCAGCCACGGAACAGCTCACCGTGCTGCTGGGCCTGAGGCCCAACCC  
PKD1P5 CCTGCGGCTGCTTGCAGCCACGGAACAGCTCACCGTGCTGCTGGGCCTGAGGCCCAACCC  
PKD1 CCTGCGGCTGCTTGCAGCCACGGAACAGCTCACCGTGCTGCTGGGCCTGAGGCCCAACCC  
PKD1P4 CCTGCGGCTGCTTGCAGCCACGGAACAGCTCACCGTGCTGCTGGGCCTGAGGCCCAACCC  
PKD1P1 CCTGCGGCTGCTTGCAGCCACGGAACAGCTCACCGTGCTGCTGGGCCTGAGGCCCAACCC  
PKD1P3 CCTGCGGCTGCTTGCAGCCACGGAACAGCTCACCGTGCTGCTGGGCCTGAGGCCCAACCC  
PKD1P6 -----

PKD1P2 TGGGCTGCGGCTGCCTGGGCCTATGAGGTCCGGGACAGAGTGGGCAATGGCGTGTCCAG  
PKD1P5 TGGGCTGCGGCTGCCTGGGCCTATGAGGTCCGGGACAGAGTGGGCAATGGCGTGTCCAG

PKD1 TGGACTGCGGCTGCCTGGGCGCTATGAGGTCCGGGCAGAGGTGGGCAATGGCGTGTCCAG  
PKD1P4 TGGGCTGCGGCTGCCTGGGCGCTATGAGGTCCGGGCAGAGGTGGGCAATGGCGTGTCCAG  
PKD1P1 TGGGCTGCGGCTGCCTGGGCGCTATGAGGTCCGGGCAGAGGTGGGCAATGGCGTGTCCAG  
PKD1P3 TGGGCTGCGGCTGCCTGGGCGCTATGAGGTCCGGGCAGAGGTGGGCAATGGCGTGTCCAG  
PKD1P6 -----

PKD1P2 GCACAACCTGTCCTGCAGCTTTGACGTGGTCTCCCCAGTGGCTGGGCTGCGGGTCATCTA  
PKD1P5 GCACAACCTGTCCTGCAGCTTTGACGTGGTCTCCCCAGTGGCTGGGCTGCGGGTCATCTA  
PKD1 GCACAACCTCTCCTGCAGCTTTGACGTGGTCTCCCCAGTGGCTGGGCTGCGGGTCATCTA  
PKD1P4 GCACAACCTGTCCTGCAGCTTTGACGTGGTCTCCCCAGTGGCTGGGCTGCGGGTCATCTA  
PKD1P1 GCACAACCTGTCCTGCAGCTTTGACGTGGTCTCCCCAGTGGCTGGGCTGCGGGTCATCTA  
PKD1P3 GCACAACCTGTCCTGCAGCTTTGACGTGGTCTCCCCAGTGGCTGGGCTGCGGGTCATCTA  
PKD1P6 -----

**c. 2489**

PKD1P2 CCCTGCCCCCGCGACGGCCGCCTCTACGTGCCACCAACGGCTCAGCCTCGGTGCTCCA  
PKD1P5 CCCTGCCCCCGCGACGGCCGCCTCTACGTGCCACCAACGGCTCAGCCTCGGTGCTCCA  
PKD1 CCCTGCCCCCGCGACGGCCGCCTCTACGTGCCACCAACGGCTCAGCCTCGGTGCTCCA  
PKD1P4 CCCTGCCCCCGCGACGGCCGCCTCTACGTGCCACCAACGGCTCAGCCTCGGTGCTCCA  
PKD1P1 CCCTGCCCCCGCGACGGCCGCCTCTACGTGCCACCAACGGCTCAGCCTCGGTGCTCCA  
PKD1P3 CCCTGCCCCCGCGACGGCCGCCTCTACGTGCCACCAACGGCTCAGCCTCGGTGCTCCA  
PKD1P6 -----

PKD1P2 GGTGGACTCTGGTGCCAGCGCCACGGCCACGGCTCGCTGGCCTGGGGGCAGTGTGAGCGC  
PKD1P5 GGTGGACTCTGGTGCCAGCGCCACGGCCACGGCTCGCTGGCCTGGGGGCAGTGTGAGCGC  
PKD1 GGTGGACTCTGGTGCCACGCGCCACGGCCACGGCTCGCTGGCCTGGGGGCAGTGTGAGCGC  
PKD1P4 GGTGGACTCTGGTGCCAGCGCCACGGCCACGGCTCGCTGGCCTGGGGGCAGTGTGAGCGC  
PKD1P1 GGTGGACTCTGGTGCCAGCGCCACGGCCACGGCTCGCTGGCCTGGGGGCAGTGTGAGCGC  
PKD1P3 GGTGGACTCTGGTGCCAGCGCCACGGCCACGGCTCGCTGGCCTGGGGGCAGTGTGAGCGC  
PKD1P6 -----

PKD1P2 CCGCTTTGAGAATGCCTGCCCTGCCCTGGTGGCCACCTTCGTGCCCGGCTGCCCTGGGA  
PKD1P5 TCGCTTTGAGAATGCCTGCCCTGCCCTGGTGGCCACCTTCGTGCCCGGCTGCCCTGGGA  
PKD1 CCGCTTTGAGAATGTCTGCCCTGCCCTGGTGGCCACCTTCGTGCCCGGCTGCCCTGGGA  
PKD1P4 CCGCTTTGAGAATGCCTGCCCTGCCCTGGTGGCCACCTTCGTGCCCGGCTGCCCTGGGA  
PKD1P1 CCGCTTTGAGAATGCCTGCCCTGCCCTGGTGGCCACCTTCGTGCCAGCTGCCCTGGGA  
PKD1P3 CCGCTTTGAGAATGCCTGCCCTGCCCTGGTGGCCACCTTCGTGCCCGGCTGCCCTGGGA  
PKD1P6 -----

**c. 2722**

PKD1P2 GACCAATGATACCCTGTTCTCAGTGGTAGCACTGCCGTGGCTCGGTGAGGGGGAGCACGT  
PKD1P5 GACCAATGATACCCTGTTCTCAGTGGTAGCACTGCCGTGGCTCGGTGAGGGGGAGCACGT  
PKD1 GACCAACGATAACCCTGTTCTCAGTGGTAGCACTGCCGTGGCTCAGTGAGGGGGAGCACGT  
PKD1P4 GACCAATGATACCCTGTTCTCAGTGGTAGCACTGCCGTGGCTCGGTGAGGGGGAGCACGT  
PKD1P1 GACCAATGATACCCTGTTCTCAGTGGTAGCACTGCCGTGGCTCGGTGAGGGGGAGCACGT  
PKD1P3 GACCAATGATACCCTGTTCTCAGTGGTAGCACTGCCGTGGCTCGGTGAGGGGGAGCACGT  
PKD1P6 -----

PKD1P2 GATGGACGTTGTGGTGGAAAACAGCGCCAGCCGGGCCAACCTCAGCCTGCGGGTGACGGC  
PKD1P5 GATGGACGTTGTGGTGGAAAACAGCGCCAGCCGGGCCAACCTCAGCCTGCGGGTGACGGC  
PKD1 GGTGGACGTTGTGGTGGAAAACAGCGCCAGCCGGGCCAACCTCAGCCTGCGGGTGACGGC  
PKD1P4 GATGGACGTTGTGGTGGAAAACAGCGCCAGCCGGGCCAACCTCAGCCTGCGGGTGACGGC  
PKD1P1 GATGGACGTTGTGGTGGAAAACAGCGCCAGCCGGGCCAACCTCAGCCTGCGGGTGACGGC  
PKD1P3 GATGGACGTTGTGGTGGAAAACAGCGCCAGCCGGGCCAACCTCAGCCTGCGGGTGACGGC  
PKD1P6 -----

PKD1P2 GGAGGAGCCCATCTGTGGCCTCCGCGCCACGCCCAGCCCCGAGGCCCGTGTACTGCAGGG  
PKD1P5 GGAGGAGCCCATCTGTGGCCTCCGCGCCACGCCCAGCCCCGAGGCCCGTGTACTGCAGGG  
PKD1 GGAGGAGCCCATCTGTGGCCTCCGCGCCACGCCCAGCCCCGAGGCCCGTGTACTGCAGGG  
PKD1P4 GGAGGAGCCCATCTGTGGCCTCCGCGCCACGCCCAGCCCCGAGGCCCGTGTACTGCAGGG  
PKD1P1 GGAGGAGCCCATCTGTGGCCTCCGCGCCACGCCCAGCCCCGAGGCCCGTGTACTGCAGGG  
PKD1P3 GGAGGAGCCCATCTGTGGCCTCCGCGCCACGCCCAGCCCCGAGGCCCGTGTACTGCAGGG  
PKD1P6 -----

PKD1P2 AGTCCCAGTGAGGTACAGCCCCGTGGTGGAGGCCGGCTCGGACATGGTCTTCCGGTGGAC  
PKD1P5 AGTCCCAGTGAGGTACAGCCCCGTGGTGGAGGCCGGCTCGGACATGGTCTTCCGGTGGAC  
PKD1 AGTCCTAGTGAGGTACAGCCCCGTGGTGGAGGCCGGCTCGGACATGGTCTTCCGGTGGAC  
PKD1P4 AGTCCCAGTGAGGTACAGCCCCGTGGTGGAGGCCGGCTCGGACATGGTCTTCCGGTGGAC  
PKD1P1 AGTCCCAGTGAGGTACAGCCCCGTGGTGGAGGCCGGCTCGGACATGGTCTTCCGGTGGAC  
PKD1P3 AGTCCCAGTGAGGTACAGCCCCGTGGTGGAGGCCGGCTCGGACATGGTCTTCCGGTGGAC  
PKD1P6 -----

PKD1P2 CATCAACGACAAGCAGTCCCTGACCTTCCAGAACGTGGTCTTCAATGTCATTTATCAGAG  
PKD1P5 CATCAACGACAAGCAGTCCCTGACCTTCCAGAACGTGGTCTTCAATGTCATTTATCAGAG  
PKD1 CATCAACGACAAGCAGTCCCTGACCTTCCAGAACGTGGTCTTCAATGTCATTTATCAGAG  
PKD1P4 CATCAACGACAAGCAGTCCCTGACCTTCCAGAACGTGGTCTTCAATGTCATTTATCAGAG  
PKD1P1 CATCAACGACAAGCAGTCCCTGACCTTCCAGAACGTGGTCTTCAATGTCATTTATCAGAG  
PKD1P3 CATCAACGACAAGCAGTCCCTGACCTTCCAGAACGTGGTCTTCAATGTCATTTATCAGAG  
PKD1P6 -----

PKD1P2 CGCGGCGGTCTTCAAGCTCTCACTGACGGCCTCCAACCACGTGAGCAACGTCACCGTGAA  
PKD1P5 CGCGGCGGTCTTCAAGCTCTCACTGACGGCCTCCAACCACGTGAGCAACGTCACCGTGAA

PKD1 CGCGGCGGTCTTCAAGCTCTCACTGACGGCCTCCAACCACGTGAGCAACGTCACCGTGAA  
PKD1P4 CGCGGCGGTCTTCAAGCTCTCACTGACGGCCTCCAACCACGTGAGCAACGTCACCGTGAA  
PKD1P1 CGCGGCGGTCTTCAAGCTCTCACTGACGGCCTCCAACCACGTGAGCAACGTCACCGTGAA  
PKD1P3 CGCGGCGGTCTTCAAGCTCTCACTGACGGCCTCCAACCACGTGAGCAACGTCACCGTGAA  
PKD1P6 -----

PKD1P2 CTACAACATCACCGTGGAGCGGATGAACAGGATGCAGGGCTGCGGGTCTCCACAGTGCC  
PKD1P5 CTACAACATCACCGTGGAGCGGATGAACAGGATGCAGGGCTGCGGGTCTCCACAGTGCC  
PKD1 CTACAACGTAACCGTGGAGCGGATGAACAGGATGCAGGGTCTGCAGGTCTCCACAGTGCC  
PKD1P4 CTACAACATCACCGTGGAGCGGATGAACAGGATGCAGGGCTGCGGGTCTCTACAGTGCC  
PKD1P1 CTACAACATCACCGTGGAGCGGATGAACAGGATGCAGGGCTGCGGGTCTCTACAGTGCC  
PKD1P3 CTACAACATCACCGTGGAGCGGATGAACAGGATGCAGGGCTGCGGGTCTCTACAGTGCC  
PKD1P6 -----

PKD1P2 GGCCGTGCTGTCCCCAATGCCACGCTGGCACTGACGGCGGGCGTGTGGTGGACTCGGC  
PKD1P5 GGCCGTGCTGTCCCCAATGCCACGCTGGCACTGACGGCGGGCGTGTGGTGGACTCGGC  
PKD1 GGCCGTGCTGTCCCCAATGCCACGCTAGCACTGACGGCGGGCGTGTGGTGGACTCGGC  
PKD1P4 AGCCGTGCTGTCCCCAATGCCACGCTGGCACTGACGGCGGGCGTGTGGTGGACTCGGC  
PKD1P1 AGCCGTGCTGTCCCCAATGCCACGCTGGCACTGACGGCGGGCGTGTGGTGGACTCGGC  
PKD1P3 AGCCGTGCTGTCCCCAATGCCACGCTGGCACTGACGGCGGGCGTGTGGTGGACTCGGC  
PKD1P6 -----

PKD1P2 CGTGGAGGTGGCCTTCTGTGGACCTTTGGGGATGGGGAGCAGGCCCTCCACCAGTTCCA  
PKD1P5 TGTGGAGGTGGCCTTCTGTGGACCTTTGGGGATGGGGAGCAGGCCCTCCACCAGTTCCA  
PKD1 CGTGGAGGTGGCCTTCTGTGGACCTTTGGGGATGGGGAGCAGGCCCTCCACCAGTTCCA  
PKD1P4 CGTGGAGGTGGCCTTCTGTGGACCTTTGGGGATGGGGAGCAGGCCCTCCACCAGTTCCA  
PKD1P1 CGTGGAGGTGGCCTTCTGTGGACCTTTGGGGATGGGGAGCAGGCCCTCCACCAGTTCCA  
PKD1P3 CGTGGAGGTGGCCTTCTGTGGACCTTTGGGGATGGGGAGCAGGCCCTCCACCAGTTCCA  
PKD1P6 -----

PKD1P2 GCCTCCGTACAACGAGTCCTTCCCAGTTCCAGACCCCTCGGTGGCCCAGGTGCTGGTGGGA  
PKD1P5 GCCTCCGTACAACGAGTCCTTCCCAGTTCCAGACCCCTCGGTGGCCCAGGTGCTGGTGGGA  
PKD1 GCCTCCGTACAACGAGTCCTTCCCAGTTCCAGACCCCTCGGTGGCCCAGGTGCTGGTGGGA  
PKD1P4 GCCTCCGTACAACGAGTCCTTCCCAGTTCCAGACCCCTCGGTGGCCCAGGTGCTGGTGGGA  
PKD1P1 GCCTCCGTACAACGAGTCCTTCCCAGTTCCAGACCCCTCGGTGGCCCAGGTGCTGGTGGGA  
PKD1P3 GCCTCCGTACAACGAGTCCTTCCCAGTTCCAGACCCCTCGGTGGCCCAGGTGCTGGTGGGA  
PKD1P6 -----

PKD1P2 GCACAATGTACGCACACCTACGCTGCCCCAGGTGAGTACGTCCTGACCGTGCTGGCATC  
PKD1P5 GCACAATGTACGCACACCTACGCTGCCCCAGGTGAGTACGTCCTGACCGTGCTGGCATC  
PKD1 GCACAATGTACGCACACCTACGCTGCCCCAGGTGAGTACCTCCTGACCGTGCTGGCATC  
PKD1P4 GCACAATGTACGCACACCTACGCTGCCCCAGGTGAGTACGTCCTGACCTTGCTGGCATC  
PKD1P1 GCACAATGTACGCACACCTACGCTGCCCCAGGTGAGTACGTCCTGACCTTGCTGGCATC  
PKD1P3 GCACAATGTACGCACACCTACGCTGCCCCAGGTGAGTACGTCCTGACCTTGCTGGCATC

PKD1P6 -----

PKD1P2 TAATGCCTTCGAGAACCGGACGCAGCAGGTGCCTGTGAGCGTGCGCGCTCCCTGCCCTC  
PKD1P5 TAATGCCTTCGAGAACCGGATGCAGCAGGTGCCTGTGAGCGTGCGCGCTCCCTGCCCTC  
PKD1 TAATGCCTTCGAGAACCTGACGCAGCAGGTGCCTGTGAGCGTGCGCGCTCCCTGCCCTC  
PKD1P4 TAATGCCTTCGAGAACCGGACGCAGCAGGTGCCTGTGAGCGTGTCGCGCTCCCTGCCCTC  
PKD1P1 TAATGCCTTCGAGAACCGGACGCAGCAGGTGCCTGTGAGCGTGTCGCGCTCCCTGCCCTC  
PKD1P3 TAATGCCTTCGAGAACCGGACGCAGCAGGTGCCTGTGAGCGTGTCGCGCTCCCTGCCCTC  
PKD1P6 -----

c. 3430

PKD1P2 CGAGGCTGTGGGTGTGAGTGACGGCGTCTCGTGGCCGGCCGGCCCGTTCACCTTCTACCC  
PKD1P5 CGAGGCTGTGGGTGTGAGTGACGGCGTCTCGTGGCCGGCCGGCCCGTTCACCTTCTACCC  
PKD1 CGTGGCTGTGGGTGTGAGTGACGGCGTCTCGTGGCCGGCCGGCCCGTTCACCTTCTACCC  
PKD1P4 -----  
PKD1P1 -----  
PKD1P3 T-----  
PKD1P6 -----

PKD1P2 GCATCTGCTGCCCTCGCCTGGGGGTGTCTTTACACGTGGGACTTCGGGGACGGCTCCCC  
PKD1P5 GCATCTGCTGCCCTCGCCTGGGGGTGTCTTTACACGTGGGACTTCGGGGACGGCTCCCC  
PKD1 GCACCCGCTGCCCTCGCCTGGGGGTGTCTTTACACGTGGGACTTCGGGGACGGCTCCCC  
PKD1P4 -----  
PKD1P1 -----  
PKD1P3 -----  
PKD1P6 -----

PKD1P2 TGTCCGTGACCCAGAGCCAGCCGGCTGCCAACCACACCTATCCCTCGAGGGGCATCTACCA  
PKD1P5 TGTCCGTGACCCAGAGCCAGCCGGCTGCCAACCACACCTATCCCTCGAGGGGCATCTACCA  
PKD1 TGTCCGTGACCCAGAGCCAGCCGGCTGCCAACCACACCTATGCCTCGAGGGGCATCTACCA  
PKD1P4 -----  
PKD1P1 -----  
PKD1P3 -----  
PKD1P6 -----

c. 3605

PKD1P2 CGTGCGCTGGAGGTCAACAACACGGTGAGCGGTGCGCGCGCCAGGCGGATGTGCGCGT  
PKD1P5 CGTGCGCTGGAGGTCAACAACACGGTGAGCGGTGCGCGCGCCAGGCGGATGTGCGCGT  
PKD1 CGTGCGCTGGAGGTCAACAACACGGTGAGCGGTGCGCGCGCCAGGCGGATGTGCGCGT  
PKD1P4 -----  
PKD1P1 -----  
PKD1P3 -----  
PKD1P6 -----

PKD1P2 CTTTGAGGAGCTCCGCGGGCTCAGCGTGGACATGAGCCTGGCCGTGGAGCAGGGCGCCCC  
PKD1P5 CTTTGAGGAGCTCCGCGGGCTCAGCGTGGACATGAGCCTGGCCGTGGAGCAGGGCGCCCC  
PKD1 CTTTGAGGAGCTCCGCGGACTCAGCGTGGACATGAGCCTGGCCGTGGAGCAGGGCGCCCC  
PKD1P4 -----  
PKD1P1 -----  
PKD1P3 -----  
PKD1P6 -----

PKD1P2 CGTGGTGGTCAGTGCCGCGGTGCAGACGGGCGACAACATCACGTGGACCTTCGACATGGG  
PKD1P5 CGTGGTGGTCAGTGCCGCGGTGCAGACGGGCGACAACATCACGTGGACCTTCGACATGGG  
PKD1 CGTGGTGGTCAGTGCCGCGGTGCAGACGGGCGACAACATCACGTGGACCTTCGACATGGG  
PKD1P4 -----  
PKD1P1 -----  
PKD1P3 -----  
PKD1P6 -----

PKD1P2 GGACGGCACCGTGCTGTTCGGGCCAGAGGCCACAGTGGAGCATGTGTACCTGCGGGCACA  
PKD1P5 GGACGGCACCGTGCTGTTCGGGCCAGAGGCCACAGTGGAGCATGTGTACCTGCGGGCACA  
PKD1 GGACGGCACCGTGCTGTTCGGGCCAGAGGCCACAGTGGAGCATGTGTACCTGCGGGCACA  
PKD1P4 -----  
PKD1P1 -----  
PKD1P3 -----  
PKD1P6 -----

PKD1P2 GAACTGCACAGTGACCGTGGGTGCGGCCAGCCCCGCCGCCACCTGGCCCGGAGCCTGCA  
PKD1P5 GAACTGCACAGTGACCGTGGGTGCGGCCAGCCCCGCCGCCACCTGGCCCGGAGCCTGCA  
PKD1 GAACTGCACAGTGACCGTGGGTGCGGCCAGCCCCGCCGCCACCTGGCCCGGAGCCTGCA  
PKD1P4 -----  
PKD1P1 -----  
PKD1P3 -----  
PKD1P6 -----

PKD1P2 CGTGCTGGTCTTCGTCCTGGAGGTGCTGCGCGTGCAGCCCGCCGCTGCATCCCCACTCA  
PKD1P5 CGTGCTGGTCTTCGTCCTGGAGGTGCTGCGCGTGCAGCCCGCCGCTGCATCCCCACTCA  
PKD1 CGTGCTGGTCTTCGTCCTGGAGGTGCTGCGCGTGCAGCCCGCCGCTGCATCCCCACTCA  
PKD1P4 -----  
PKD1P1 -----  
PKD1P3 -----  
PKD1P6 -----

PKD1P2 GCCTGACGCGGGCTCACGGCCTACGTACCCGGGAACCCGGCCCGCTACCTCTTCGACTG  
PKD1P5 GCCTGACGCGGGCTCACGGCCTACGTACCCGGGAACCCGGCCCGCTACCTCTTCGACTG  
PKD1 GCCTGACGCGGGCTCACGGCCTACGTACCCGGGAACCCGGCCCGCTACCTCTTCGACTG

PKD1P4 -----  
PKD1P1 -----  
PKD1P3 -----  
PKD1P6 -----

PKD1P2 GACCTTTGGGGATGGCTCCTCCAACACGACCATGCGGGGGTGCCCGACGGTGACACACAA  
PKD1P5 GACCTTTGGGGATGGCTCCTCCAACACGACCATGCGGGGGTGCCCGACGGTGACACACAA  
PKD1 GACCTTCGGGGATGGCTCCTCCAACACGACCGTGCAGGGGGTGCCCGACGGTGACACACAA  
PKD1P4 -----  
PKD1P1 -----  
PKD1P3 -----  
PKD1P6 -----

PKD1P2 CTTACGCGTAGCGGCACGTTCCCCCTGGCGCTGGTGCTGTCCAGCCGCGTGAACAGGGC  
PKD1P5 CTTACGCGTAGCGGCACGTTCCCCCTGGCGCTGGTGCTGTCCAGCCGCGTGAACAGGGC  
PKD1 CTTACGCGGAGCGGCACGTTCCCCCTGGCGCTGGTGCTGTCCAGCCGCGTGAACAGGGC  
PKD1P4 -----  
PKD1P1 -----  
PKD1P3 -----  
PKD1P6 -----

PKD1P2 GCGTTACTTACCAGCATCTGCGTGGAGCCAGAGGTGGGCAACGTCACCCGTCAGCCAGA  
PKD1P5 GCGTTACTTACCAGCATCTGCGTGGAGCCAGAGGTGGGCAACGTCACCCGTCAGCCAGA  
PKD1 GCATTACTTACCAGCATCTGCGTGGAGCCAGAGGTGGGCAACGTCACCCGTCAGCCAGA  
PKD1P4 -----  
PKD1P1 -----  
PKD1P3 -----  
PKD1P6 -----

PKD1P2 GAGGCAGTTTGTGCAGCTCGGGGACGAGGCCCGGCTGGTGGCATGTGCCTGGCCCCGTT  
PKD1P5 GAGGCAGTTTGTGCAGCTCGGGGACGAGGCCCGGCTGGTGGCATGTGCCTGGCCCCGTT  
PKD1 GAGGCAGTTTGTGCAGCTCGGGGACGAGGCCCGGCTGGTGGCATGTGCCTGGCCCCGTT  
PKD1P4 -----  
PKD1P1 -----  
PKD1P3 -----  
PKD1P6 -----

c. 4264

PKD1P2 CCCCTACCGCTACACCTGGGACTTTGGCACCGAAGAAGCCGTTCCCGCCCGTGTTCGGGGG  
PKD1P5 CCCCTACCGCTACACCTGGGACTTTGGCACCGAAGAAGCCGTTCCCGCCCGTGTTCGGGGG  
PKD1 CCCCTACCGCTACACCTGGGACTTTGGCACCGAAGAAGCCGTTCCCGCCCGTGTTCGGGGG  
PKD1P4 -----  
PKD1P1 -----  
PKD1P3 -----

PKD1P6 -----  
  
PKD1P2 CCCTGAGGTGACGTTTCATCTACCGAGACCCAGGCTCCTATCTTGTGACAGTCACCGCGTC  
PKD1P5 CCCTGAGGTGACGTTTCATCTACCGAGACCCAGGCTCCTATCTTGTGACAGTCACCGCGTC  
PKD1 CCCTGAGGTGACGTTTCATCTACCGAGACCCAGGCTCCTATCTTGTGACAGTCACCGCGTC  
PKD1P4 -----  
PKD1P1 -----  
PKD1P3 -----  
PKD1P6 -----  
  
PKD1P2 CAACAACATCTCCGCTGCCAATGACTCAGCCCTGGTGGAGGTGCAGGAGCCCGTGCTGGT  
PKD1P5 CAACAACATCTCCGCTGCCAATGACTCAGCCCTGGTGGAGGTGCAGGAGCCCGTGCTGGT  
PKD1 CAACAACATCTCTGCTGCCAATGACTCAGCCCTGGTGGAGGTGCAGGAGCCCGTGCTGGT  
PKD1P4 -----  
PKD1P1 -----  
PKD1P3 -----  
PKD1P6 -----  
  
PKD1P2 CACCAGCATCAAGGTCAATGGCTCCCTTGGGCTGGAGCTGCAGTAGCCGTACCTGTTCTC  
PKD1P5 CACCAGCATCAAGGTCAATGGCTCCCTTGGGCTGGAGCTGCAGCAGCCGTACCTGTTCTC  
PKD1 CACCAGCATCAAGGTCAATGGCTCCCTTGGGCTGGAGCTGCAGCAGCCGTACCTGTTCTC  
PKD1P4 -----  
PKD1P1 -----  
PKD1P3 -----  
PKD1P6 -----  
  
PKD1P2 TGCTGTGGGCCGTGGGCGCCCCGCCAGCTACCTGTGGGATCTGGGGGACGGTGGGCGGCT  
PKD1P5 TGCTGTGGGCCGTGGGCGCCCCGCCAGCTACCTGTGGGATCTGGGGGACGGTGGGCGGCT  
PKD1 TGCTGTGGGCCGTGGGCGCCCCGCCAGCTACCTGTGGGATCTGGGGGACGGTGGGTGGCT  
PKD1P4 -----  
PKD1P1 -----  
PKD1P3 -----  
PKD1P6 -----  
  
PKD1P2 CGAGGGTCCGGAGGTCAACCACGCTTACAACAGCACAGGTGACTTCACCGTTAGGGTGGC  
PKD1P5 CGAGGGTCCGGAGGTCAACCACGCTTACAACAGCACAGGTGACTTCACCGTTAGGGTGGC  
PKD1 CGAGGGTCCGGAGGTCAACCACGCTTACAACAGCACAGGTGACTTCACCGTTAGGGTGGC  
PKD1P4 -----  
PKD1P1 -----  
PKD1P3 -----  
PKD1P6 -----  
  
PKD1P2 CGGCTGCAATGAGGTGAGCCGACGCGAGGCCTGGCTCAATGTGACGGTGAAGCGGCGCGT

PKD1P5 CGGCTGCAATGAGGTGAGCCGACGCGAGGCCTGGCTCAATGTGACGGTGAAGCGGCGCGT  
PKD1 CGGCTGGAATGAGGTGAGCCGACGCGAGGCCTGGCTCAATGTGACGGTGAAGCGGCGCGT  
PKD1P4 -----  
PKD1P1 -----  
PKD1P3 -----  
PKD1P6 -----  
  
PKD1P2 GCGGGGGCTCATCGTCAATGCCAGCTGCACGGTGGTGCCCTGAATGGGAGCATGAGCTT  
PKD1P5 GCGGGGGCTCATCGTCAATGCCAGCTGCACGGTGGTGCCCTGAATGGGAGCATGAGCTT  
PKD1 GCGGGGGCTCATCGTCAATGCAAGCCGACGGTGGTGCCCTGAATGGGAGCGTGAGCTT  
PKD1P4 -----  
PKD1P1 -----  
PKD1P3 -----  
PKD1P6 -----  
  
PKD1P2 CAGCACCTCGCTGGAGGCCGGCAGTGATGTGCGCTATTCCCTGGGTGCTCTGTGACCGCTG  
PKD1P5 CAGCACCTCGCTGGAGGCCGGCAGTGATGTGCGCTATTCCCTGGGTGCTCTGTGACCGCTG  
PKD1 CAGCACGTCGCTGGAGGCCGGCAGTGATGTGCGCTATTCCCTGGGTGCTCTGTGACCGCTG  
PKD1P4 -----  
PKD1P1 -----  
PKD1P3 -----  
PKD1P6 -----  
  
PKD1P2 CACGCCCATCTCTGGGGTCTGCCATCTCTTTACACCTTCCGCTCCGTGGGCACCTTCA  
PKD1P5 CACGCCCATCTCTGGGGTCTGCCATCTCTTTACACCTTCCGCTCCGTGGGCACCTTCA  
PKD1 CACGCCCATCCCTGGGGTCTACCATCTCTT-ACACCTTCCGCTCCGTGGGCACCTTCA  
PKD1P4 -----  
PKD1P1 -----  
PKD1P3 -----  
PKD1P6 -----  
  
PKD1P2 ATATCATCGTCACAGCTGAGAACGAGGTGGGCTCCGCCAGGACAGCATCTTCGTCTATG  
PKD1P5 ATATCATCGTCACAGCTGAGAACGAGGTGGGCTCCGCCAGGACAGCATCTTCGTCTATG  
PKD1 ATATCATCGTCACGGCTGAGAACGAGGTGGGCTCCGCCAGGACAGCATCTTCGTCTATG  
PKD1P4 -----  
PKD1P1 -----  
PKD1P3 -----  
PKD1P6 -----  
  
PKD1P2 TCCTGCAGCTCATAGAGGGGTGCAGGTGGTGGGCGGTGGCCGCTACTTCCCCACCAACC  
PKD1P5 TCCTGCAGCTCATAGAGGGGTGCAGGTGGTGGGCGGTGGCCGCTACTTCCCCACCAACC  
PKD1 TCCTGCAGCTCATAGAGGGGTGCAGGTGGTGGGCGGTGGCCGCTACTTCCCCACCAACC  
PKD1P4 -----  
PKD1P1 -----



PKD1P3 -----  
PKD1P6 -----

PKD1P2 ACACGGTACAGCTGCAGGCCGTGGTCAGGGATGGCACCAAC---ATCTACAGCTGGACTG  
PKD1P5 ACATGGTACAGCTGCAGGCCGTGGTCAGGGACGGCACCATC---TCCTACAGCTGGACTG  
PKD1 ACACGGTACAGCTGCAGGCCGTGGTTAGGGATGGCACCAACGTCTCTACAGCTGGACTG  
PKD1P4 -----  
PKD1P1 -----  
PKD1P3 -----  
PKD1P6 -----

PKD1P2 CCTGGAGGGACAGGGGCCCGCCCTGGCCGGCAGCGGCAAAGGCTTCTCGCTCACTGCGC  
PKD1P5 CCTGGAGGGACAGGGGCCCGCCCTGGCCGGCAGCGGCAAAGGCTTCTCGCTCACC GCGC  
PKD1 CCTGGAGGGACAGGGGCCCGCCCTGGCCGGCAGCGGCAAAGGCTTCTCGCTCACC GTC  
PKD1P4 -----  
PKD1P1 -----  
PKD1P3 -----  
PKD1P6 -----

PKD1P2 TCGAGGCCGGCACCTACCATGTGCAGCTGCGGGCCACCAACATGCTGGGCAGCGCCTGGG  
PKD1P5 TCGAGGCCGGCTCCTACCATGTGCAGCTGCGGGCCACCAACATGCTGGGCAGCGCCTGGG  
PKD1 TCGAGGCCGGCACCTACCATGTGCAGCTGCGGGCCACCAACATGCTGGGCAGCGCCTGGG  
PKD1P4 -----  
PKD1P1 -----  
PKD1P3 -----  
PKD1P6 -----

PKD1P2 CTGACTGCACCGTGGACTTCGTGGAGCCTGTGGGGTGGCTGATGGTGGCCGCCTCCCCGA  
PKD1P5 CTGACTGCACCGTGGACTTCGTGGAGCCTGTGGGGTGGCTGATGGTGGCCGCCTCCCCGA  
PKD1 CCGACTGCACCATGGACTTCGTGGAGCCTGTGGGGTGGCTGATGGTGGCCGCCTCCCCGA  
PKD1P4 -----  
PKD1P1 -----  
PKD1P3 -----  
PKD1P6 -----

PKD1P2 ACCCAGCTGCCGTCAACACAAGTGTACCCCTCAGTGCCGAGCTGGCTGGTGGCAGTGGTG  
PKD1P5 ACCCAGCTGCCGTCAACACAAGCGTACCCCTCAGTGCCGAGCTGGCTGGTGGCAGTGGTG  
PKD1 ACCCAGCTGCCGTCAACACAAGCGTACCCCTCAGTGCCGAGCTGGCTGGTGGCAGTGGTG  
PKD1P4 -----  
PKD1P1 -----  
PKD1P3 -----  
PKD1P6 -----

PKD1P2 TCGTATACACTTGGTCCTTGGAGGAGGGGCTGAGCTGGGAGACCCCCGAGCCATTTACCA  
PKD1P5 TCGTATACACTTGGTCCTTGGAGGAGGGGCTGAGCTGGGAGACCCCCGAGCCATTTACCA  
PKD1 TCGTATACACTTGGTCCTTGGAGGAGGGGCTGAGCTGGGAGACCTCCGAGCCATTTACCA  
PKD1P4 -----  
PKD1P1 -----  
PKD1P3 -----  
PKD1P6 -----ATGCCGCCCGCCG

PKD1P2 CCCACAGCTTCCCCACACCCGGCCTGCACTTGGTCACCATGACGGCAGGGAACCCGCTGG  
PKD1P5 CCCACAGCTTCCCCACACCCGGCCTGCACTTGGTCACCATGACGGCAGGGAACCCGCTGG  
PKD1 CCCATAGCTTCCCCACACCCGGCCTGCACTTGGTCACCATGACGGCAGGGAACCCGCTGG  
PKD1P4 -----  
PKD1P1 -----  
PKD1P3 -----  
PKD1P6 CGCCCCCGCCCTGGCGCTGGCCCTGGCCCTGGGC-CTGTGGCT-CGGGGCGCTGGCGGG

**c. 5363**

PKD1P2 .  
GCTCAGCCAACGCCACCGTGGAAAGTGGATGTGCAGGTGCCTGTGAGTGGCCTCAGCATCA  
PKD1P5 GCTCAGCCAACGCCACCGTGGAAAGTGGATGTGCAGGTGCCTGTGAGTGGCCTCAGCATCA  
PKD1 GCTCAGCCAACGCCACCGTGGAAAGTGGATGTGCAGGTGCCTGTGAGTGGCCTCAGCATCA  
PKD1P4 -----  
PKD1P1 -----  
PKD1P3 -----  
PKD1P6 GGGCCCCGGGCGGGCTGCGGGCCTTG-CGAGCCCCCTGCCTCTGCGGCCT-AGCGCC

PKD1P2 GGGCCAGCGAGCCGGGAGGCAGCTTCGTGGCGGCCGGTCTCTGTGCCCTTTTGGGGGC  
PKD1P5 GGGCCAGCGAGCCGGGAGGCAGCTTCGTGGCGGCCGGTCTCTGTGCCCTTTTGGGGGC  
PKD1 GGGCCAGCGAGCCGGGAGGCAGCTTCGTGGCGGCCGGTCTCTGTGCCCTTTTGGGGGC  
PKD1P4 -----  
PKD1P1 -----  
PKD1P3 -----  
PKD1P6 GGCGCCGCTGCC--GCGTCAACTGCTCGGGCCGCGGGCTGCGGAGCTCGGTCCCGCGC

PKD1P2 AGCTGGCCACGGGCACCAATGTGAGCTGGTGTGCGGCTGTGCCGGCGGCAGCAGCAAGC  
PKD1P5 AGCTGGCCACGGGCACCAATGTGAGCTGGTGTGCGGCTGTGCCGGCGGCAGCAGCAAGC  
PKD1 AGCTGGCCACGGGCACCAATGTGAGCTGGTGTGCGGCTGTGCCGGCGGCAGCAGCAAGC  
PKD1P4 -----TGTGAGC-----  
PKD1P1 -----TGTGAGC--GT-----  
PKD1P3 -----  
PKD1P6 TGCGCATCCCCGCGGACGCCACAGCGCTACGTCTCCACAACTGCTCCGGGCGCTGGAC

PKD1P2 GTGGCCCTCATGTACCATGGTCTTCCCGGATGCTGGCACCTTCAACATCCGGCTCAATG  
PKD1P5 GTGGCCCTCATGTACCATGGTCTTCCCGGATGCTGGCACCTTCAACATCTGGCTCAATG  
PKD1 GTGGCCCTCATGTACCATGGTCTTCCCGGATGCTGGCACCTTCTCCATCCGGCTCAATG

PKD1P4 -----  
PKD1P1 -----  
PKD1P3 -----  
PKD1P6 GTTGGGCTCCTGGCGAACCTCTCGGCGCTGGCAGAGCTGGATATAAGCAACAACAAGATT

**c. 5611**

PKD1P2 CCTCCAACG CAGTCAGCTGGGTCT-CAGCCACGTACAACCTCACGGTGGAGGAGCCCATC  
PKD1P5 CCTCCAACG CAGTCAGCTGGGTCT-CAGCCACGTACAACCTCACGGTGGAGGAGCCCATC  
PKD1 CCTCCAACG CAGTCAGCTGGGTCT-CAGCCACGTACAACCTCACGGCGGAGGAGCCCATC  
PKD1P4 -----  
PKD1P1 -----  
PKD1P3 -----  
PKD1P6 TCTACGTTAGAAGAAGGAATATTGCTAATTTATTTAATTTAAGTGAAATAAACCTGAGT

PKD1P2 GTGGGCCTGGTGTGTGGGCCAGCAGCAAGGTGGTGGCGCCCGGGCAGCTTGTCCATTTT  
PKD1P5 GTGGGCCTGGTGTGTGGGCCAGCAGCAAGGTGGTGGCGCCCGGGCAGCTTGTCCATTTT  
PKD1 GTGGGCCTGGTGTGTGGGCCAGCAGCAAGGTGGTGGCGCCCGGGCAGCTTGTCCATTTT  
PKD1P4 -----  
PKD1P1 -----  
PKD1P3 -----  
PKD1P6 GGGAACCCGTTTGTAGTGTGACTGTGGCCTGGCGTGGCTGCCGCGATGGGCGGAGGAGCAG

PKD1P2 CAGATCCTGCTGGCTGCCGGCTCAGCTGTCACCTTCCGCTGCAGGTTCGGCGGGGCCAGC  
PKD1P5 CAGATCCTGCTGGCTGCCGGCTCAGCTGTCACCTTCCGCTGCAGGTTCGGCGGGGCCAGC  
PKD1 CAGATCCTGCTGGCTGCCGGCTCAGCTGTCACCTTCCGCTGCAGGTTCGGCGGGGCCAAC  
PKD1P4 -----  
PKD1P1 -----  
PKD1P3 -----  
PKD1P6 CAGGTGCGGGTGGTGCAGCCGAGGCAGCCACGTGTGCTGGCCTGACTCCCTGGCTGGC

**c. 5783**

PKD1P2 CCGAAGTGTCCCTGGGCCCGTTTCTCCACAGCTTCCCCGCATCGGAGACCACGTG  
PKD1P5 CCGAAGTGTCCCTGGGCCCGTTTCTCCACAGCTTCCCCGCATCGGAGACCACGTG  
PKD1 CCGAAGTGTCCCTGGGCCCGTTTCTCCACAGCTTCCCCGCATCGGAGACCACGTG  
PKD1P4 -----  
PKD1P1 -----  
PKD1P3 -----  
PKD1P6 C---AGCCTCTGCTTGGCATCCCTTGCTGGACAGTGGCTGTGGT----GAGAGTATGTC

PKD1P2 GTGAGCGTGCAGGGCAAAAACCACGTGAGCTGGGCCAGGCGCAGGTGCGCATCGTGGTG  
PKD1P5 GTGAGCGTGCAGGGCAAAAACCACGTGAGCTGGGCCAGGCGCAGGTGCGCATCGTGGTG  
PKD1 GTGAGCGTGCAGGGCAAAAACCACGTGAGCTGGGCCAGGCGCAGGTGCGCATCGTGGTG  
PKD1P4 -----

PKD1P1 -----  
PKD1P3 -----  
PKD1P6 GCCTGCCTCCCTGACAACAGCT-----CAGGCACCGTGGCAGCAGTGTCTTTTCAG

PKD1P2 CTGGAGGCCGTGAGCGGGCTGCAGGTGCCCAACTGCTGTGAGCCTGGCATCGCCATGGGC  
PKD1P5 CTGGAGGCCGTGAGCGGGCTGCAGGTGCCCAACTGCTGTGAGCCTGGCATCGCCATGGGC  
PKD1 CTGGAGGCCGTGAGTGGGCTGCAGGTGCCCAACTGCTGCGAGCCTGGCATCGCCACGGGC  
PKD1P4 -----  
PKD1P1 -----  
PKD1P3 -----  
PKD1P6 CTGCCAC-GAAGCCTGCTTCAGCCAGAGCCTGCAGCGCTTCTGCTTCTCCACGGC

**c. 5964**

PKD1P2 ACTGAGAGGAACTTCACAGCCCGCTGCAGCGCGGCTCTCGGGTCGCTACGCCTGGTAC  
PKD1P5 ACTGAGAGGAACTTCACAGCCCGCTGCAGCGCGGCTCTCGGGTCGCTACGCCTGGTAC  
PKD1 ACTGAGAGGAACTTCACAGCCCGCTGCAGCGCGGCTCTCGGGTCGCTACGCCTGGTAC  
PKD1P4 -----  
PKD1P1 -----  
PKD1P3 -----  
PKD1P6 C-----AGGGCCTCGCAGCCCTCTCGGAGCAGGGCT-----GGTGCCTGTGTGGGGCGG

PKD1P2 TTCTCGTGCAGAAGGTCCGGGGCGACTCTCTGTTTCATCCTGTTCGGGCCGCGACGTCACC  
PKD1P5 TTCTCGTGCAGAAGGTCCGGGGCGACTCTCTGTTTCATCCTGTTCGGGCCGCGACGTCACC  
PKD1 TTCTCGTGCAGAAGGTCCAGGGCGACTCGCTGGTTCATCCTGTTCGGGCCGCGACGTCACC  
PKD1P4 -----  
PKD1P1 -----  
PKD1P3 -----  
PKD1P6 CCC-----AGCCTCTAGTGCCTCCTTCGCTGCCTGTCCCTCTGCTCCGGCCCC

PKD1P2 TACACGCC-GTGGCCGCGGGGCTGTTGGAGATCCAGGTGCGTGCCTTCAACGCCCTGGGC  
PKD1P5 TACACGCC-GTGGCCGCGGGGCTGTTGGAGATCCAGGTGCGTGCCTTCAACGCCCTGGGC  
PKD1 TACACGCCGTGGCCGCGGGGCTGTTGGAGATCCAGGTGCGCGCCTTCAACGCCCTGGGC  
PKD1P4 -----  
PKD1P1 -----  
PKD1P3 -----  
PKD1P6 CCGCCGCTCCTGCCCCAC-CTGTAGGGGCCCA----CCCTCCTCA-----

PKD1P2 AGTGAGAACCGCACGCTGGTGTGGAGGTTTTCAGGACGCCGTCAGTATGTGGCCCTGCGG  
PKD1P5 AGTGAGAACCGCACGCTGGTGTGGAGGTTTTCAGGACGCCGTCAGTATGTGGCCCTGCGC  
PKD1 AGTGAGAACCGCACGCTGGTGTGGAGGTTTTCAGGACGCCGTCAGTATGTGGCCCTGCGG  
PKD1P4 -----  
PKD1P1 -----  
PKD1P3 -----  
PKD1P6 -----GCAGTCTTCCCTGCCTCCCCAGGGGCCCCCTGG--TGGGGCCCCACGG

PKD1P2 AGCGGCCCTGCTTACCAACCGCTTGGCGCAGTTTGGAGCCGCCACCAGCCCCAGCCCC  
PKD1P5 AGCGGCCCTGCTTACCAACCGCTCGGCGCAGTTTGGAGCCGCCACCAGCCCCAGCCCC  
PKD1 AGCGGCCCTGCTTACCAACCGCTCGGCGCAGTTTGGAGCCGCCACCAGCCCCAGCCCC  
PKD1P4 -----  
PKD1P1 -----  
PKD1P3 -----  
PKD1P6 A----CCCCTGGC-CTCCGGCCAGCTAGCAGCCTTCCACATCGCT----GCCCGCTCCC

PKD1P2 CGGCGCGTGGCCTACCCTGGGACTTTGGGGATGGGTCCCAGGGCAGGACACAGATAAG  
PKD1P5 CGGCGCGTGGCCTACCCTGGGACTTTGGGGATGGGTCCCAGGGCAGGACACAGATGAG  
PKD1 CGGCGTGTGGCCTACCCTGGGACTTTGGGGATGGGTCCCAGGGCAGGACACAGATGAG  
PKD1P4 -----  
PKD1P1 -----  
PKD1P3 -----  
PKD1P6 TGTCACT--GCCACACGCTGGGACTTCGGAGACGGCTCCCCGAGGTGGATGCCGCTGGG

PKD1P2 CCCAGGGCCGAGCACTCCTACCTGAGGCCTGGGGACTACCGCGTGCAGGTGAACGCCTCC  
PKD1P5 CCCAGGGCCGAGCACTCCTACCTGAGGCCTGGGGACTACCGCGTGCAGGTGAACGCCTCC  
PKD1 CCCAGGGCCGAGCACTCCTACCTGAGGCCTGGGGACTACCGCGTGCAGGTGAACGCCTCC  
PKD1P4 -----  
PKD1P1 -----  
PKD1P3 -----  
PKD1P6 CCGGCTGCCTCGCATCGCTATGTGCTGCCTGGGCGCTATCACGTGACGGC---CGTGCTG

PKD1P2 AACCTGGTGAGCTTTTTTCGTGGCGCAGGCCACGGTGACCGTCCAGGTGCTGGCCTGCCGG  
PKD1P5 AACCTGGTGAGCTTTTTTCGTGGCGCAGGCCACGGTGACCGTCCAGGTGCTGGCCTGCCGG  
PKD1 AACCTGGTGAGCTTCTTCGTGGCGCAGGCCACGGTGACCGTCCAGGTGCTGGCCTGCCGG  
PKD1P4 -----  
PKD1P1 -----  
PKD1P3 -----  
PKD1P6 GCCCTGGGGCCGGCTCAGCCCTGCTGGGGACAGA---CGTGCAGGTGGAAGCGGCACCT

PKD1P2 GAGCCGGAGGTGGACGTGGTCTGCCCCGTCAGGTGCTGATGCCAGCATCACAGCGCAAC  
PKD1P5 GAGCCGGAGGTGGACGTGGTCTGCCCCGTCAGGTGCTGATGCCAGCATCACAGCGCAAC  
PKD1 GAGCCGGAGGTGGACGTGGTCTGCCCCGTCAGGTGCTGATGCCAGCATCACAGCGCAAC  
PKD1P4 -----  
PKD1P1 -----  
PKD1P3 -----  
PKD1P6 GCCGCCCTGGAGCTCGTGTGCCCCGTCCTCG-GTGCAGAGTGACGAGAGCCTCGACCTCAG

PKD1P2 TGCCTGGATGCCTACGTTGACCTGCGCGACTGTGTACCTACCAGACTGAGTACCCTGG  
PKD1P5 TGCCTGGATGCCTACGTTGACCTGCGCGACTGTGTACCTACCAGACTGAGTACCCTGG

PKD1 TACTTGGAGGCCACGTTGACCTGCGCGACTGCGTACCTACCAGACTGAGTACCCTGG  
PKD1P4 -----  
PKD1P1 -----  
PKD1P3 -----  
PKD1P6 CATCCAGAA--CCGCGGTGGTTCAGGCCTGGAGGCTGCCTACAGCATCG--TGGCCCTGG

PKD1P2 GAGGTGTACCGCACCGCCAGCTGCCAGCGGGCCGGGGTGCCCGCGCGTGTGGCCCTGCC  
PKD1P5 GAGGTGTACCGCACCGCCAGCTGCCAGCGGGCCGGGGTGCCCGCGCGTGTGGCCCTGCC  
PKD1 GAGGTGTATCGCACCGCCAGCTGCCAGCGGGCCGGGGTGCCCGCGCGTGTGGCCCTGCC  
PKD1P4 -----  
PKD1P1 -----  
PKD1P3 -----  
PKD1P6 GCGAGAGCCGGCCCCGAGCGGTGCACCCGCTCTGCCCTCGGACACG-GAGATCTTCTCT

PKD1P2 GGCCTGGACGTGAGCCGGCCTCAGCTGGTGC-----TGCCCGGGCTGGCGCTGCCTGTG  
PKD1P5 GGCCTGGACGTGAGCCGGCCTCAGCTGGTGC-----TGCCGTGGCTGGCGCTGCCTGTG  
PKD1 GGCCTGGACGTGAGCCGGCCTCGGCTGGTGC-----TGCCCGGGCTGGCGCTGCCTGTG  
PKD1P4 -----  
PKD1P1 -----  
PKD1P3 -----  
PKD1P6 GGCAACGGGCACTGCTACCGCCTGGTGGTGGAGAAGGCGGCCTGGCTGCAGGCGCAGGAG

PKD1P2 GGGCACTA---CTGCTTTGTGTTTGTCTGTGCATTTGGGGACACGCCACTGGCACGGAGC  
PKD1P5 GGGCACTA---CTGCTTTGTGTTTGTCTGTGCATTTGGGGACACGCCACTGGCACGGAGC  
PKD1 GGGCACTA---CTGCTTTGTGTTTGTCTGTGCATTTGGGGACACGCCACTGACACAGAGC  
PKD1P4 -----  
PKD1P1 -----  
PKD1P3 -----  
PKD1P6 CAGTGTGGGCTGGGCCGGGGCCGCTGGCAATGGTGGACAGTCCCGCCGTGCAGCGC

PKD1P2 ATCCAGGCCAATGTGACGGT--GGCCCCGAGCGCCTGGTGCCATCACTGAGGGTGGCT  
PKD1P5 ATCCAGGCCAATGTGACGGT--GGCCCCGAGCGCCTGGTGCCATCACTGAGGGTGGCT  
PKD1 ATCCAGGCCAATGTGACGGT--GGCCCCGAGCGCCTGGTGCCATCACTGAGGGTGGCT  
PKD1P4 -----  
PKD1P1 -----  
PKD1P3 -----  
PKD1P6 TTCTTGGTCTCCCGGTCACCAGGAGCCTAGACGTGTGGATCGGCTTCTCGACTGTGCAG

PKD1P2 CCTACCGCG-TGTGGTCAGACACACAGGACCTGGTGTGGATGGGAGCGAGTCTTACGAC  
PKD1P5 CCTACCGCG-TGTGGTCAGACACACAGGACCTGGTGTGGATGGGAGCGAGTCTTACGAC  
PKD1 CATACCGCG-TGTGGTCAGACACACAGGACCTGGTGTGGATGGGAGCGAGTCTTACGAC  
PKD1P4 -----  
PKD1P1 -----  
PKD1P3 -----

PKD1P6 CGGGTGGAGGTGGGCCACGCCAGCGCCGAGGGCCCTCAGCCTGGAGAGCTGCCAGAAC  
PKD1P2 CC-CAACCTGGAGGACGGCGACCAGACGCCGCTCAGTTTCCAGTGGGCCCTGTGTGGCTTC  
PKD1P5 CC-CAACCTGGAGGACGGCGACCAGACGCCGCTCAGTTTCCAGTGGGCCCTGTGTGGCTTC  
PKD1 CC-CAACCTGGAGGACGGCGACCAGACGCCGCTCAGTTTCCACTGGGCCCTGTGTGGCTTC  
PKD1P4 -----  
PKD1P1 -----  
PKD1P3 -----  
PKD1P6 TGGCTGCCCGGGGAGCCACACCCAGCCACAGCCGAG----CACTGCATCTGGCTCGGGCC

PKD1P2 GACACAGAGGGAGGCTGGCGGGTGTGCGCTGAACTTTGGGCCCCGCGGGAGCAGCACGGT  
PKD1P5 GACACAGAGGGAGGCTGGCGGGTGTGCGCTGAACTTTGGGCCCCGCGGGAGCAGCACGGT  
PKD1 GACACAGAGGGAGGCTGGCGGGTGTGCGCTGAACTTTGGGCCCCGCGGGAGCAGCACGGT  
PKD1P4 -----  
PKD1P1 -----  
PKD1P3 -----  
PKD1P6 --CACCAAGGGAGGCTGGCGGGTGTGCGCTGAACTTTGGGCCCCGCGGGAGCAGCACGGT

c. 6992

PKD1P2 CACCATTCCACGGGAACGGCTGGCAGCTGGCGTGGAGTACACCTTCAGCCTCACCGTGTG  
PKD1P5 CACCATTCCACGGGAACGGCTGGCAGCTGGCGTGGAGTACACCTTCAGCCTCACCGTGTG  
PKD1 CACCATTCCACGGGAGCGGCTGGCAGCTGGCGTGGAGTACACCTTCAGCCTGACCGTGTG  
PKD1P4 -----  
PKD1P1 -----  
PKD1P3 -----  
PKD1P6 CACCATTCCACGGGAACGGCTGGCAGCTGGCGTGGAGTACACCTTCAGCCTCACCGTGTG

PKD1P2 GAAGGCCGGCCACAAGGAGGAGGCCACCAACCAGACGGTGTGATCCGCAGTGGCCGGGT  
PKD1P5 GAAGGCCGGCCACAAGGAGGAGGCCACCAACCAGACGGTGTGATCCGCAGTGGCCGGGT  
PKD1 GAAGGCCGGCCACAAGGAGGAGGCCACCAACCAGACGGTGTGATCCGCAGTGGCCGGGT  
PKD1P4 -----GTGCTGATCCGCAGTGGCCGGGT  
PKD1P1 -----GTGCTGATCCGCAGTGGCCGGGT  
PKD1P3 -----GTGCTGATCCGCAGTGGCCGGGT  
PKD1P6 GAAGGCCGGCCACAAGGAGGAGGCCACCAACCAGACGGTGTGATCCGCAGTGGCCGGGT  
\*\*\*\*\*

PKD1P2 GCCCATTGTGTCTTGGAGTGTGTGTCTGCAAGGCACAGGCCGTGTACGAAGTGAGCCG  
PKD1P5 GCCCATTGTGTCTTGGAGTGTGTGTCTGCAAGGCACAGGCCGTGTACGAAGTGAGCCG  
PKD1 GCCCATTGTGTCTTGGAGTGTGTGTCTGCAAGGCACAGGCCGTGTACGAAGTGAGCCG  
PKD1P4 GCCCATTGTGTCTTGGAGTGTGTGTCTGCAAGGCACAGGCCGTGTACGAAGTGAGCCG  
PKD1P1 GCCCATTGTGTCTTGGAGTGTGTGTCTGCAAGGCACAGGCCGTGTACGAAGTGAGCCG  
PKD1P3 GCCCATTGTGTCTTGGAGTGTGTGTCTGCAAGGCACAGGCCGTGTACGAAGTGAGCCG  
PKD1P6 GCCCATTGTGTCTTGGAGTGTGTGTCTGCAAGGCACAGGCCGTGTACGAAGTGAGCCG  
\*\*\*\*\*

PKD1P2 CAGCTCCTACGTGTACTGGAGGGCCGCTGCCTCAATTGCAGCAGCGGCTCCAAGCGAGG  
PKD1P5 CAGCTCCTACGTGTACTGGAGGGCCGCTGCCTCAATTGCAGCAGCGGCTCCAAGCGAGG  
PKD1 CAGCTCCTACGTGTACTGGAGGGCCGCTGCCTCAATTGCAGCAGCGGCTCCAAGCGAGG  
PKD1P4 CAGCTCCTACGTGTACTGGAGGGCCGCTGCCTCAATTGCAGCAGCGGCTCCAAGCGAGG  
PKD1P1 CAGCTCCTACGTGTACTGGAGGGCCGCTGCCTCAATTGCAGCAGCGGCTCCAAGCGAGG  
PKD1P3 CAGCTCCTACGTGTACTGGAGGGCCGCTGCCTCAATTGCAGCAGCGGCTCCAAGCGAGG  
PKD1P6 CAGCTCCTACGTGTACTGGAGGGCCGCTGCCTCAATTGCAGCAGCGGCTCCAAGCGAGG  
\*\*\*\*\*

PKD1P2 GCGGTGGGCTGCACGTACGTTTCAGCAACAAGACGCTGGTGTGGATGAGACCACCACATC  
PKD1P5 GCGGTGGGCTGCACGTACGTTTCAGCAACAAGACGCTGGTGTGGATGAGACCACCACATC  
PKD1 GCGGTGGGCTGCACGTACGTTTCAGCAACAAGACGCTGGTGTGGATGAGACCACCACATC  
PKD1P4 GCGGTGGGCTGCACGTACGTTTCAGCAACAAGACGCTGGTGTGGATGAGACCACCACATC  
PKD1P1 GCGGTGGGCTGCACGTACGTTTCAGCAACAAGACGCTGGTGTGGATGAGACCACCACATC  
PKD1P3 GCGGTGGGCTGCACGTACGTTTCAGCAACAAGACGCTGGTGTGGATGAGACCACCACATC  
PKD1P6 GCGGTGGGCTGCACGTACGTTTCAGCAACAAGACGCTGGTGTGGATGAGACCACCACATC  
\*\*\*\*\*

PKD1P2 CACGGGCAGCGCAGGCATGTGACTGGTGTGCGGGCGGGCGTGTGCGGGACGGCGAGGG  
PKD1P5 CACGGGCAGCGCAGGCATGTGACTGGTGTGCGGGCGGGCGTGTGCGGGACGGCGAGGG  
PKD1 CACGGGCAGCGCAGGCATGTGACTGGTGTGCGGGCGGGCGTGTGCGGGACGGCGAGGG  
PKD1P4 CACGGGCAGCGCAGGCATGTGACTGGTGTGCGGGCGGGCGTGTGCGGGACGGCGAGGG  
PKD1P1 CACGGGCAGCGCAGGCATGTGACTGGTGTGCGGGCGGGCGTGTGCGGGACGGCGAGGG  
PKD1P3 CACGGGCAGCGCAGGCATGTGACTGGTGTGCGGGCGGGCGTGTGCGGGACGGCGAGGG  
PKD1P6 CACGGGCAGCGCAGGCATGTGACTGGTGTGCGGGCGGGCGTGTGCGGGACGGCGAGGG  
\*\*\*\*\*

PKD1P2 ATACACCTTCACGCTGACGGTGTGCGGCCGCTCTGGCAGGAGGAGGGCTGCGCCTCCAT  
PKD1P5 ATACACCTTCACGCTGACGGTGTGCGGCCGCTCTGGCAGGAGGAGGGCTGCGCCTCCAT  
PKD1 ATACACCTTCACGCTGACGGTGTGCGGCCGCTCTGGCAGGAGGAGGGCTGCGCCTCCAT  
PKD1P4 ATACACCTTCACGCTGACGGTGTGCGGCCGCTCTGGCAGGAGGAGGGCTGCGCCTCCAT  
PKD1P1 ATACACCTTCACGCTGACGGTGTGCGGCCGCTCTGGCAGGAGGAGGGCTGCGCCTCCAT  
PKD1P3 ATACACCTTCACGCTGACGGTGTGCGGCCGCTCTGGCAGGAGGAGGGCTGCGCCTCCAT  
PKD1P6 ATACACCTTCACGCTGACGGTGTGCGGCCGCTCTGGCAGGAGGAGGGCTGCGCCTCCAT  
\*\*\*\*\*

PKD1P2 CCCCCGTCCCCCAACCGCCCGCCGCTGGGGGCTCTTGTGCGCTCTTCCACTGGGCGC  
PKD1P5 CCCCCGTCCCCCAACCGCCCGCCGCTGGAGGGCTCTTGTGCGCTCTTCCACTGGGCGC  
PKD1 CCGCCTGTCCCCCAACCGCCCGCCGCTGGGGGCTCTTGTGCGCTCTTCCACTGGGCGC  
PKD1P4 CCCCCGTCCCCCAACCGCCCGCCGCTGGGGGCTCTTGTGCGCTCTTCCACTGGGCGC  
PKD1P1 CCCCCGTCCCCCAACCGCCCGCCGCTGGGGGCTCTTGTGCGCTCTTCCACTGGGCGC  
PKD1P3 CCCCCGTCCCCCAACCGCCCGCCGCTGGGGGCTCTTGTGCGCTCTTCCACTGGGCGC  
PKD1P6 CCCCCGTCCCCCAACCGCCCGCCGCTGGGGGCTCTTGTGCGCTCTTCCACTGGGCGC  
\*\* \*\*\*\*\*

PKD1P2 TGTGCAGCCCTCACCAAGGTGCACCTTCAATGCACGGGCTGGCATGACCGGAGGA  
PKD1P5 TGTGCAGCCCTCACCAAGGTGCACCTTCAATGCACGGGCTGGCATGACCGGAGGA  
PKD1 TGTGCAGCCCTCACCAAGGTGCACCTTCAATGCACGGGCTGGCATGACCGGAGGA  
PKD1P4 TGTGCAGCTCTCACCAAGGTGCACCTTCAATGCATGGGCTGGCATGACCGGAGGA

PKD1P1 TGTGCACGCTCTCACCACCAAGGTGCACCTCGAATGCATGGGCTGGCATGACGCGGAGGA  
PKD1P3 TGTGCACGCTCTCACCACCAAGGTGCACCTCGAATGCATGGGCTGGCATGACGCGGAGGA  
PKD1P6 TGTGCACGCTCTCACCACCAAGGTGCACCTCGAATGCATGGGCTGGCATGACGCGGAGGA  
\*\*\*\*\*

PKD1P2 TGCTGGCGCCCCGCTGGTGTATGCCCTGCTGCTGCAGCGCTGTTGCCAGGGCCACTGCAA  
PKD1P5 TGCTGGCGCCCCGCTGGTGTACGCCCTGCTGCTGCAGCGCTGTTGCCAGGGCCACTGCAA  
PKD1 TGCTGGCGCCCCGCTGGTGTACGCCCTGCTGCTGCAGCGCTGTCGCCAGGGCCACTGCGA  
PKD1P4 TGCTGGCGCCCCGCTGGTGTACGCCCTGCTGCTGCAGCGCTGTCGCCAGGGCCACTGCGA  
PKD1P1 TGCTGGCGCCCCGCTGGTGTACGCCCTGCTGCTGCAGCGCTGTCGCCAGGGCCACTGCGA  
PKD1P3 TGCTGGCGCCCCGCTGGTGTACGCCCTGCTGCTGCAGCGCTGTCGCCAGGGCCACTGCGA  
PKD1P6 TGCTGGCGCCCCGCTGGTGTACGCCCTGCTGCTGCAGCGCTGTCGCCAGGGCCACTGCGA  
\*\*\*\*\*

PKD1P2 AGAGTTCTGTGTCTACAAGAGCAGCCTCTCCGGCTACGGAGCCGTGCTGCCCCGGGTTT  
PKD1P5 AGAGTTCTGTGTCTACAAGAGCAGCCTCTCCGGCTACGGAGCCGTGCTGCCCCGGGTTT  
PKD1 GGAGTTCTGTGTCTACAAGGGCAGCCTCTCCAGCTACGGAGCCGTGCTGCCCCGGGTTT  
PKD1P4 GGAGTTCTGTGTCTACAAGGGCAGCCTCTCCGGCTACGGAGCCGTGCTGCCCCGGGTTT  
PKD1P1 GGAGTTCTGTGTCTACAAGGGCAGCCTCTCCGGCTACGGAGCCGTGCTGCCCCGGGTTT  
PKD1P3 GGAGTTCTGTGTCTACAAGGGCAGCCTCTCCGGCTACGGAGCCGTGCTGCCCCGGGTTT  
PKD1P6 GGAGTTCTGTGTCTACAAGGGCAGCCTCTCCGGCTACGGAGCCGTGCTGCCCCGGGTTT  
\*\*\*\*\*

PKD1P2 CAGGCCACACTTCGAGGTGGGCCTGGCCGTGGTGGTGCAGGACCAGCTGGGAGCCGCTGT  
PKD1P5 CAGGCCACACTTCGAGGTGGGCCTGGCCGTGGTGGTGCAGGACCAGCTGGGAGCCGCTGT  
PKD1 CAGGCCACACTTCGAGGTGGGCCTGGCCGTGGTGGTGCAGGACCAGCTGGGAGCCGCTGT  
PKD1P4 CAGGCCACACTTCGAGGTGGGCCTGGCCGTGGTGGTGCAGGACCAGCTGGGAGCCGCTGT  
PKD1P1 CAGGCCACACTTCGAGGTGGGCCTGGCCGTGGTGGTGCAGGACCAGCTGGGAGCCGCTGT  
PKD1P3 CAGGCCACACTTCGAGGTGGGCCTGGCCGTGGTGGTGCAGGACCAGCTGGGAGCCGCTGT  
PKD1P6 CAGGCCACACTTCGAGGTGGGCCTGGCCGTGGTGGTGCAGGACCAGCTGGGAGCCGCTGT  
\*\*\*\*\*

PKD1P2 GGTGCGCCCTCAACAGGTCTCTGGCCATCACCCCTCCAGAGCCCAACGGCAGCGCAATGGG  
PKD1P5 GGTGCGCCCTCAACAGGTCTCTGGCCATCACCCCTCCAGAGCCCAACGGCAGCGCAATGGG  
PKD1 GGTGCGCCCTCAACAGGTCTCTGGCCATCACCCCTCCAGAGCCCAACGGCAGCGCAATGGG  
PKD1P4 GGTGCGCCCTCAACAGGTCTCTGGCCATCACCCCTCCAGAGCCCAACGGCAGCGCAATGGG  
PKD1P1 GGTGCGCCCTCAACAGGTCTCTGGCCATCACCCCTCCAGAGCCCAACGGCAGCGCAATGGG  
PKD1P3 GGTGCGCCCTCAACAGGTCTCTGGCCATCACCCCTCCAGAGCCCAACGGCAGCGCAATGGG  
PKD1P6 GGTGCGCCCTCAACAGGTCTCTGGCCATCACCCCTCCAGAGCCCAACGGCAGCGCAATGGG  
\*\*\*\*\*

PKD1P2 GCTCACAGTCTGGCTGCACGGGCTCACCGCTAGTGTGCTCCCGGGGCTGCTGCGGCAGGC  
PKD1P5 GCTCACAGTCTGGCTGCACGGGCTCACCGCTAGTGTGCTCCCGGGGCTGCTGCGGCAGGC  
PKD1 GCTCACAGTCTGGCTGCACGGGCTCACCGCTAGTGTGCTCCCGGGGCTGCTGCGGCAGGC  
PKD1P4 GCTCACAGTCTGGCTGCACGGGCTCACCGCTAGTGTGCTCCCGGGGCTGCTGCGGCAGGC  
PKD1P1 GCTCACAGTCTGGCTGCACGGGCTCACCGCTAGTGTGCTCCCGGGGCTGCTGCGGCAGGC  
PKD1P3 GCTCACAGTCTGGCTGCACGGGCTCACCGCTAGTGTGCTCCCGGGGCTGCTGCGGCAGGC  
PKD1P6 GCTCACAGTCTGGCTGCACGGGCTCACCGCTAGTGTGCTCCCGGGGCTGCTGCGGCAGGC  
\*\*\*\*\*

PKD1P2 CGATCCCCAGCACGTCATCGAGTACTCGCTGGCCCTGGTCACTGTGCTGAACGAGTACGA  
PKD1P5 CGATCCCCAGCACGTCATCGAGTACTCGCTGGCCCTGGTCACTGTGCTGAACGAGTACGA  
PKD1 CGATCCCCAGCACGTCATCGAGTACTCGTGGCCCTGGTCACTGTGCTGAACGAGTACGA  
PKD1P4 CGATCCCCAGCACGTCATCGAGTACTCGCTGGCCCTGGTCACTGTGCTGAACGAGTACGA  
PKD1P1 CGATCCCCAGCACGTCATCGAGTACTCGCTGGCCCTGGTCACTGTGCTGAACGAGTACGA  
PKD1P3 CGATCCCCAGCACGTCATCGAGTACTCGCTGGCCCTGGTCACTGTGCTGAACGAGTACGA  
PKD1P6 CGATCCCCAGCACGTCATCGAGTACTCGCTGGCCCTGGTCACTGTGCTGAACGAGTACGA  
\*\*\*\*\*

PKD1P2 GCGGGCCCTGGACGTTGGCGGCAGAGCCCAAGCACGAGCGGCAGCGCCGAGCCAGATACG  
PKD1P5 GCGGGCCCTGGACGTTGGCGGCAGAGCCCAAGCACGAGCGGCAGCGCCGAGCCAGATACG  
PKD1 GCGGGCCCTGGACGTTGGCGGCAGAGCCCAAGCACGAGCGGCAGCGCCGAGCCAGATACG  
PKD1P4 GCGGGCCCTGGACGTTGGCGGCAGAGCCCAAGCACGAGCGGCAGCGCCGAGCCAGATACG  
PKD1P1 GCGGGCCCTGGACGTTGGCGGCAGAGCCCAAGCACGAGCGGCAGCGCCGAGCCAGATACG  
PKD1P3 GCGGGCCCTGGACGTTGGCGGCAGAGCCCAAGCACGAGCGGCAGCGCCGAGCCAGATACG  
PKD1P6 GCGGGCCCTGGACGTTGGCGGCAGAGCCCAAGCACGAGCGGCAGCGCCGAGCCAGATACG  
\*\*\*\*\*

PKD1P2 CAAGAACATCACGGAGACTCTGGTGTCCCTGAGGGTCCACACTGTGGATGACATCCAGCA  
PKD1P5 CAAGAACATCACGGAGACTCTGGTGTCCCTGAGGGTCCACACTGTGGATGACATCCAGCA  
PKD1 CAAGAACATCACGGAGACTCTGGTGTCCCTGAGGGTCCACACTGTGGATGACATCCAGCA  
PKD1P4 CAAGAACATCACGGAGACTCTGGTGTCCCTGAGGGTCCACACTGTGGATGACATCCAGCA  
PKD1P1 CAAGAACATCACGGAGACTCTGGTGTCCCTGAGGGTCCACACTGTGGATGACATCCAGCA  
PKD1P3 CAAGAACATCACGGAGACTCTGGTGTCCCTGAGGGTCCACACTGTGGATGACATCCAGCA  
PKD1P6 CAAGAACATCACGGAGACTCTGGTGTCCCTGAGGGTCCACACTGTGGATGACATCCAGCA  
\*\*\*\*\*

PKD1P2 GATCGCTGCTGCGCTGGCCAGTGCATGG-----  
PKD1P5 GATCGCTGCTGCGCTGGCCAGTGCATGG-----  
PKD1 GATCGCTGCTGCGCTGGCCAGTGCATGGGGCCAGCAGGGAGCTCGTATGCCGCTCGTG  
PKD1P4 GATCGCTGCTGCGCTGGCCAGTGCATGGGGCCAGCAGGGAGCTCGTATGCCGCTCGTG  
PKD1P1 GATCGCTGCTGCGCTGGCCAGTGCATGGGGCCAGCAGGGAGCTCGTATGCCGCTCGTG  
PKD1P3 GATCGCTGCTGCGCTGGCCAGTGCATGGGGCCAGCAGGGAGCTCGTATGCCGCTCGTG  
PKD1P6 GATCGCTGCTGCGCTGGCCAGTGCATGG-----  
\*\*\*\*\*

PKD1P2 -----  
PKD1P5 -----  
PKD1 CCTGAAGCAGACGCTGCACAAGCTGGAGGCCATGATGCTCATCTGCAGGCAGAGACCAC  
PKD1P4 CCTGAAGCAGACGCTGCACAAGCTGGAGGCCATGATGCTCATCTGCAGGCAGAGACCAC  
PKD1P1 CCTGAAGCAGACGCTGCACAAGCTGGAGGCCATGATGCTCATCTGCAGGCAGAGACCAC  
PKD1P3 CCTGAAGCAGACGCTGCACAAGCTGGAGGCCATGATGCTCATCTGCAGGCAGAGACCAC  
PKD1P6 -----

**c. 8111**  
PKD1P2 -----AGACCT  
PKD1P5 -----AGACCT

PKD1 CGCGGGCACCGTGACGCCACCGCCATCGGAGACAGCATCCTCAACATCACAGGAGACCT  
PKD1P4 CGCGGGCACCGTGACGCCACCGCCATCGGAGACAGCATCCTCAACATCACAGGAGACCT  
PKD1P5 CGCGGGCACCGTGACGCCACCGCCATCGGAGACAGCATCCTCAACATCACAGGAGACCT  
PKD1P3 CGCGGGCACCGTGACGCCACCGCCATCGGAGACAGCATCCTCAACATCACAGGAGACCT  
PKD1P6 -----AGACCT  
\*\*\*\*\*

PKD1P2 CATCCACCTGGCCAGCTCAGACGTGCGGGCACCAGCGCTCAGAGCTGGGAGCCGAGTC  
PKD1P5 CATCCACCTGGCCAGCTCAGACGTGCGGGCACCAGCGCTCAGAGCTGGGAGCCGAGTC  
PKD1 CATCCACCTGGCCAGCTCAGACGTGCGGGCACCAGCGCTCAGAGCTGGGAGCCGAGTC  
PKD1P4 CATCCACCTGGCCAGCTCAGACGTGCGGGCACCAGCGCTCAGAGCTGGGAGCCGAGTC  
PKD1P1 CATCCACCTGGCCAGCTCAGACGTGCGGGCACCAGCGCTCAGAGCTGGGAGCCGAGTC  
PKD1P3 CATCCACCTGGCCAGCTCAGACGTGCGGGCACCAGCGCTCAGAGCTGGGAGCCGAGTC  
PKD1P6 CATCCACCTGGCCAGCTCAGACGTGCGGGCACCAGCGCTCAGAGCTGGGAGCCGAGTC  
\*\*\*\*\*

PKD1P2 ACCATGCGGATGGTGGCGTCCCAGGCCATAAAGCTGACCTCTGCCCTCATGCGCATCCT  
PKD1P5 ACCATGCGGATGGTGGCGTCCCAGGCCATAAAGCTGACCTCTGCCCTCATGCGCATCCT  
PKD1 ACCATGCGGATGGTGGCGTCCCAGGCCATAAAGCTGACCTCTGCCCTCATGCGCATCCT  
PKD1P4 ACCATGCGGATGGTGGCGTCCCAGGCCATAAAGCTGACCTCTGCCCTCATGCGCATCCT  
PKD1P1 ACCATGCGGATGGTGGCGTCCCAGGCCATAAAGCTGACCTCTGCCCTCATGCGCATCCT  
PKD1P3 ACCATGCGGATGGTGGCGTCCCAGGCCATAAAGCTGACCTCTGCCCTCATGCGCATCCT  
PKD1P6 ACCATGCGGATGGTGGCGTCCCAGGCCATAAAGCTGACCTCTGCCCTCATGCGCATCCT  
\*\*\*\*\*

PKD1P2 CACGCGCTCCCGCGTGCTCAACGAGGAGCCCGTGACGCTGGCGGGCGAGGAGATCATGGC  
PKD1P5 CACGCGCTCCCGCGTGCTCAACGAGGAGCCCGTGACGCTGGCGGGCGAGGAGATCATGGC  
PKD1 CATGCGCTCCCGCGTGCTCAACGAGGAGCCCGTGACGCTGGCGGGCGAGGAGATCATGGC  
PKD1P4 CACGCGCTCCCGCGTGCTCAACGAGGAGCCCGTGACGCTGGCGGGCGAGGAGATCATGGC  
PKD1P1 CACGCGCTCCCGCGTGCTCAACGAGGAGCCCGTGACGCTGGCGGGCGAGGAGATCATGGC  
PKD1P3 CACGCGCTCCCGCGTGCTCAACGAGGAGCCCGTGACGCTGGCGGGCGAGGAGATCATGGC  
PKD1P6 CACGCGCTCCCGCGTGCTCAACGAGGAGCCCGTGACGCTGGCGGGCGAGGAGATCATGGC  
\*\* \*\*\*\*\*

PKD1P2 CCAGGGCAAGCGCTCGGACCCGCGGAGCCTGCTGTGCTATGGCGGCGCCCCAGGGCCTGG  
PKD1P5 CCAGGGCAAGCGCTCGGACCCGCGGAGCCTGCTGTGCTATGGCGGCGCCCCAGGGCCTGG  
PKD1 CCAGGGCAAGCGCTCGGACCCGCGGAGCCTGCTGTGCTATGGCGGCGCCCCAGGGCCTGG  
PKD1P4 CCAGGGCAAGCGCTCGGACCCGCGGAGCCTGCTGTGCTATGGCGGCGCCCCAGGGCCTGG  
PKD1P1 CCAGGGCAAGCGCTCGGACCCGCGGAGCCTGCTGTGCTATGGCGGCGCCCCAGGGCCTGG  
PKD1P3 CCAGGGCAAGCGCTCGGACCCGCGGAGCCTGCTGTGCTATGGCGGCGCCCCAGGGCCTGG  
PKD1P6 CCAGGGCAAGCGCTCGGACCCGCGGAGCCTGCTGTGCTATGGCGGCGCCCCAGGGCCTGG  
\*\*\*\*\*

PKD1P2 CTGCCACCTCTCCATCCCCTAGGCTTTCAGCAGGGCCCCGGCCAACTCAGTGACGTGGT  
PKD1P5 CTGCCACTTCTCCATCCCCTAGGCTTTCAGCAGGGCCCCGGCCAACTCAGTGACGTGGT  
PKD1 CTGCCACTTCTCCATCCCCTAGGCTTTCAGCAGGGCCCCGGCCAACTCAGTGACGTGGT  
PKD1P4 CTGCCACCTCTCCATCCCCTAGGCTTTCAGCAGGGCCCCGGCCAACTCAGTGACGTGGT  
PKD1P1 CTGCCACTTCTCCATCCCCTAGGCTTTCAGCAGGGCCCCGGCCAACTCAGTGACGTGGT  
PKD1P3 CTGCCACTTCTCCATCCCCTAGGCTTTCAGCAGGGCCCCGGCCAACTCAGTGACGTGGT

PKD1P6 CTGCCACTTCTCCATCCCCTAGGCTTTCAGCAGGGCCCCGGCTAACCTCAGTGACGTGGT  
\*\*\*\*\*

PKD1P2 GCAGCTCGTCTTCTGGTGGACTCCAATCCCTTTCTCTTTGGCTATATCAGCAACTACAC  
PKD1P5 GCAGCTCATCTTCTGGTGGACTCCAATCCCTTTCCCTTTGGCTATATCAGCAACTACAC  
PKD1 GCAGCTCATCTTCTGGTGGACTCCAATCCCTTTCCCTTTGGCTATATCAGCAACTACAC  
PKD1P4 GCAGCTCGTCTTCTGGTGGACTCCAATCCCTTTCTCTTTGGCTATATCAGCAACTACAC  
PKD1P1 GCAGCTCATCTTCTGGTGGACTCCAATCCCTTTCCCTTTGGCTATATCAGCAACTACAC  
PKD1P3 GCAGCTCATCTTCTGGTGGACTCCAATCCCTTTCCCTTTGGCTATATCAGCAACTACAC  
PKD1P6 GCAGCTCATCTTCTGGTGGACTCCAATCCCTTTCCCTTTGGCTATATCAGCAACTACAC  
\*\*\*\*\*

PKD1P2 CGTCTCCACCAAGGTGGCCTCGATGGCGTTCCAGACACAGGCCGGCGCCAGATCCCCAT  
PKD1P5 CGTCTCCACCAAGGTGGCCTCGATGGCGTTCCAGACACAGGCCGGCGCCAGATCCCCAT  
PKD1 CGTCTCCACCAAGGTGGCCTCGATGGCGTTCCAGACACAGGCCGGCGCCAGATCCCCAT  
PKD1P4 CGTCTCCACCAAGGTGGCCTCGATGGCGTTCCAGACACAGGCCGGCGCCAGATCCCCAT  
PKD1P1 CGTCTCCACCAAGGTGGCCTCGATGGCGTTCCAGACACAGGCCGGCGCCAGATCCCCAT  
PKD1P3 CGTCTCCACCAAGGTGGCCTCGATGGCGTTCCAGACACAGGCCGGCGCCAGATCCCCAT  
PKD1P6 CGTCTCCACCAAGGTGGCCTCGATGGCGTTCCAGACACAGGCCGGCGCCAGATCCCCAT  
\*\*\*\*\*

PKD1P2 CGAGCGGCTGGCCTCAGAGCGGCCATCACCGTGAAGGTGCCAACAACCTCGGACTGGGC  
PKD1P5 CGAGCGGCTGGCCTCAGAGCGGCC-TCACCGTGAAGGTGCCAACAACCTCGGACTGGGC  
PKD1 CGAGCGGCTGGCCTCAGAGCGGCCATCACCGTGAAGGTGCCAACAACCTCGGACTGGGC  
PKD1P4 CGAGCGGCTGGCCTCAGAGCGGCCATCACCGTGAAGGTGCCAACAACCTCGGACTGGGC  
PKD1P1 CGAGCGGCTGGCCTCAGAGCGGCC-TCACCGTGAAGGTGCCAACAACCTCGGACTGGGC  
PKD1P3 CGAGCGGCTGGCCTCAGAGCGGCC-TCACCGTGAAGGTGCCAACAACCTCGGACTGGGC  
PKD1P6 CGAGCGGCTGGCCTCAGAGCGGCCATCACCGTGAAGGTGCCAACAACCTCGGACTGGGC  
\*\*\*\*\*

PKD1P2 TGCCCCGGGGCCACTGACGCTCCGCCAACTCCG-----TTGTGGTCCAGCCCCAGGC  
PKD1P5 TGCCCCGGGGCCACCGCAGCTCCGCCAACTCCG-----TTGTGGTCCAGCCCCAGGC  
PKD1 TGCCCCGGGGCCACCGCAGCTCCGCCAACTCCG-----TTGTGGTCCAGCCCCAGGC  
PKD1P4 TGCCCCGGGGCCACCGCAGCTCCGCCAACTCCG-----TTGTGGTCCAGCCCCAGGC  
PKD1P1 TGCCCCGGGGCCACCGCAGCTCCGCCAACTCCG-----TTGTGGTCCAGCCCCAGGC  
PKD1P3 TGCCCCGGGGCCACCGCAGCTCCGCCAACTCCG-----TTGTGGTCCAGCCCCAGGC  
PKD1P6 TGCCCCGGGGCCACCGCAGCTCCGCCAACTCCG-----TTGTGGTCCAGCCCCAGGC  
\*\*\*\*\*

PKD1P2 CTCCGTCGGTGCTGTGGTACCCTGGACAGCAGCAACCCTGTGGCCGTGCTGCATCTGCA  
PKD1P5 CTCCGTCGGTGCTGTGGTACCCTGGACAGCAGCAACCCTGCGGCGGTGCTGCATCTGCA  
PKD1 CTCCGTCGGTGCTGTGGTACCCTGGACAGCAGCAACCCTGCGGCGGGTGCATCTGCA  
PKD1P4 CTCCGTCGGTGCTGTGGTACCCTGGACAGCAGCAACCCTGTGGCCGTGCTGCATCTGCA  
PKD1P1 CTCCGTCGGTGCTGTGGTACCCTGGACAGCAGCAACCCTGCGGCGGTGCTGCATCTGCA  
PKD1P3 CTCCGTCGGTGCTGTGGTACCCTGGACAGCAGCAACCCTGCGGCGGTGCTGCATCTGCA  
PKD1P6 CTCCGTCGGTGCTGTGGTACCCTGGACAGCAGCAACCCTGCGGCGGTGCTGCATCTGCA  
\*\*\*\*\*

PKD1P2 GCTCAACTATACGCTGCTGGACGG-----

PKD1P5 GCTCAACTATACGCTGCTGGACGG-----  
PKD1 GCTCAACTATACGCTGCTGGACGG-----  
PKD1P4 GCTCAACTATACGCTGCTGGACGG-----  
PKD1P1 GCTCAACTATACGCTGCTGGACGGTGCATGCAGCGGTTGGGGCACACGCGCCCCCTGGC  
PKD1P3 GCTCAACTATACGCTGCTGGACGGTGCATGCAGCGGTTGGGGCACACGCGCCCCCTGGC  
PKD1P6 GCTCAACTATACGCTGCTGGACGG-----  
\*\*\*\*\*

PKD1P2 -----  
PKD1P5 -----  
PKD1 -----  
PKD1P4 -----  
PKD1P1 CTTGTTCTTGGGGGAAGGCGTTTCTCGTAGGGCTTCCATGGGTGTCTCTGGTGAATTT  
PKD1P3 CTTGTTCTTGGGGGAAGGCGTTTCTCGTAGGGCTTCCATGGGTGTCTCTGGTGAATTT  
PKD1P6 -----

PKD1P2 -----  
PKD1P5 -----  
PKD1 -----  
PKD1P4 -----  
PKD1P1 GCTTTCTGTTTCATGGGCTGCTGGGGGCCTGGCCGGAGAGGAGCTGGGGGCCACGGAGAA  
PKD1P3 GCTTTCTGTTTCATGGGCTGCTGGGGGCCTGGCCGGAGAGGAGCTGGGGGCCACGGAGAA  
PKD1P6 -----

PKD1P2 -----CCGCTACCTGTCTGAGGAACCCGAGCCCTACCTGGCAGTCTACCTGCACTCGGAG  
PKD1P5 -----CCGCTACCTGTCTGAGGAACCCGAGCCCTACCTGGCAGTCTACCTGCACTCGGAG  
PKD1 -----CCACTACCTGTCTGAGGAACCTGAGCCCTACCTGGCAGTCTACCTACACTCGGAG  
PKD1P4 -----CCGCTACCTGTCTGAGGAACCCGAGCCCTACCTGGCAGTCTACCTGCACTCGGAG  
PKD1P1 GCAGGCCGCTACCTGTCTGAGGAACCCGAGCCCTACCTGGCAGTCTACCTGCACTCGGAG  
PKD1P3 GCAGGCCGCTACCTGTCTGAGGAACCCGAGCCCTACCTGGCAGTCTACCTGCACTCGGAG  
PKD1P6 -----CCGCTACCTGTCTGAGGAACCCGAGCCCTACCTGGCAGTCTACCTGCACTCGGAG  
\* \* \* \* \*

PKD1P2 CCCCAGCCCAATGAGCGCAACTGCTCGGCTAGCAGGAGGATCCGCCAGAGTCCCTCCAG  
PKD1P5 CCCCAGCCCAATGAGCGCAACTGCTCGGCTAGCAGGAGGATCCGCCAGAGTCCCTCCAG  
PKD1 CCCCAGCCCAATGAGCGCAACTGCTCGGCTAGCAGGAGGATCCGCCAGAGTCCCTCCAG  
PKD1P4 CCCCAGCCCAATGAGCGCAACTGCTCGGCTAGCAGGAGGATCCGCCAGAGTCCCTCCAG  
PKD1P1 CCCCAGCCCAATGAGCGCAACTGCTCGGCTAGCAGGAGGATCCGCCAGAGTCCCTCCAG  
PKD1P3 CCCCAGCCCAATGAGCGCAACTGCTCGGCTAGCAGGAGGATCCGCCAGAGTCCCTCCAG  
PKD1P6 CCCCAGCCCAATGAGCGCAACTGCTCGGCTAGCAGGAGGATCCGCCAGAGTCCCTCCAG  
\*\*\*\*\*

PKD1P2 GGTGCCGACCACCGGCCCTACACCTTCTTCATTTCCCGGGGACCAGAGACCCAGTGGGG  
PKD1P5 GGTGCCGACCACCGGCCCTACACCTTCTTCATTTCCCGGGGACCAGAGACCCAGTGGGG  
PKD1 GGTGCTGACCACCGGCCCTACACCTTCTTCATTTCCCGGGGAGCAGAGACCCAGCGGGG  
PKD1P4 GGTGCCGACCACCGGCCCTACACCTTCTTCATTTCCCGGGGACCAGAGACCCAGTGGGG  
PKD1P1 GGTGCCGACCACCGGCCCTACACCTTCTTCATTTCCCGGGGACCAGAGACCCAGTGGGG

PKD1P3 GGTGCCGACCACCGGCCCTACACCTTCTTCATTTCCCGGGGACCAGAGACCCAGTGGGG  
PKD1P6 GGTGCCGACCACCGGCCCTACACCTTCTTCATTTCCCGGGGACCAGAGACCCAGTGGGG  
\*\*\*\*\*

PKD1P2 AGTTACCGTCTGAACCTCTCCAGCCACTTCCGCTGGTCCGGCCTGGAGGTGTCCGTGGGC  
PKD1P5 AGTTACCGTCTGAACCTCTCCAGCCACTTCCGCTGGTCCGGCCTGGAGGTGTCCGTGGGC  
PKD1 AGTTACCATCTGAACCTCTCCAGCCACTTCCGCTGGTCCGGCCTGCAGGTGTCCGTGGGC  
PKD1P4 AGTTACCGTCTGAACCTCTCCAGCCACTTCCGCTGGTCCGGCCTGGAGGTGTCCGTGGGC  
PKD1P1 AGTTACCGTCTGAACCTCTCCAGCCACTTCCGCTGGTCCGGCCTGGAGGTGTCCGTGGGC  
PKD1P3 AGTTACCGTCTGAACCTCTCCAGCCACTTCCGCTGGTCCGGCCTGGAGGTGTCCGTGGGC  
PKD1P6 AGTTACCGTCTGAACCTCTCCAGCCACTTCCGCTGGTCCGGCCTGGAGGTGTCCGTGGGC  
\*\*\*\*\*

PKD1P2 TTGTACACGTCCTGTGCCAGTACTTCAGCGAGGAGGATGTGGTGTGGCGGACAGAGGGG  
PKD1P5 TTGTACACGTCCTGTGCCAGTACTTCAGCGAGGAGGACGTGGTGTGGCGGACAGAGGGG  
PKD1 CTGTACACGTCCTGTGCCAGTACTTCAGCGAGGAGGACATGGTGTGGCGGACAGAGGGG  
PKD1P4 TTGTACACGTCCTGTGCCAGTACTTCAGCGAGGAGGATGTGGTGTGGCGGACAGAGGGG  
PKD1P1 TTGTACACGTCCTGTGCCAGTACTTCAGCGAGGAGGACGTGGTGTGGCGGACAGAGGGG  
PKD1P3 TTGTACACGTCCTGTGCCAGTACTTCAGCGAGGAGGACGTGGTGTGGCGGACAGAGGGG  
PKD1P6 CTGTACACGTCCTGTGCCAGTACTTCAGCGAGGAGGACGTGGTGTGGCGGACAGAGGGG  
\*\*\*\*\*

PKD1P2 CTGCTGCCCTGGAGGAGACCTCGCCCCGCCAGGCCGTCTGCCTCACCCGCCACCTCACC  
PKD1P5 CTGCTGCCCTGGAGGAGACCTCGCCCCGCCAGGCCGTCTGCCTCACCCGCCACCTCACC  
PKD1 CTGCTGCCCTGGAGGAGACCTCGCCCCGCCAGGCCGTCTGCCTCACCCGCCACCTCACC  
PKD1P4 CTGCTGCCCTGGAGGAGACCTCGCCCCGCCAGGCCGTCTGCCTCACCCGCCACCTCACC  
PKD1P1 CTGCTGCCCTGGAGGAGACCTCGCCCCGCCAGGCCGTCTGCCTCACCCGCCACCTCACC  
PKD1P3 CTGCTGCCCTGGAGGAGACCTCGCCCCGCCAGGCCGTCTGCCTCACCCGCCACCTCACC  
PKD1P6 CTGCTGCCCTGGAGGAGACCTCGCCCCGCCAGGCCGTCTGCCTCACCCGCCACCTCACC  
\*\*\*\*\*

PKD1P2 GCCTTCGGCACCAGCCTCTTCATGCCCCCAAGCCATGTACGCTTTGTGTTTCCTGAGCCG  
PKD1P5 GCCTTCGGCACCAGCCTCTTCATGCCCCCAAGCCATATCCGCTTTGTGTTTCCTGAGCCA  
PKD1 GCCTTCGGCACCAGCCTCTTCATGCCCCCAAGCCATGTACGCTTTGTGTTTCCTGAGCCG  
PKD1P4 GCCTTCGGCACCAGCCTCTTCATGCCCCCAAGCCATGTACGCTTTGTGTTTCCTGAGCCG  
PKD1P1 GCCTTCGGCACCAGCCTCTTCATGCCCCCAAGCCATGTACGCTTTGTGTTTCCTGAGCCA  
PKD1P3 GCCTTCGGCACCAGCCTCTTCATGCCCCCAAGCCATATCCGCTTTGTGTTTCCTGAGCCA  
PKD1P6 GCCTTCGGCACCAGCCTCTTCATGCCCCCAAGCCATGTACGCTTTGTGTTTCCTGAGCCG  
\*\*\*\*\*

PKD1P2 ACAGCGGATGTAAACTACATCGTCATGCTGACATGTGCTGTGTGCCTGGTACCTACATG  
PKD1P5 ACAGCGGATGTAAACTACATCGTCATGCTGACATGTGCTGTGTGCCTGGTACCTACATG  
PKD1 ACAGCGGATGTAAACTACATCGTCATGCTGACATGTGCTGTGTGCCTGGTACCTACATG  
PKD1P4 ACAGCGGATGTAAACTACATCGTCATGCTGACATGTGCTGTGTGCCTGGTACCTACATG  
PKD1P1 ACAGCGGATGTAAACTACATCGTCATGCTGACATGTGCTGTGTGCCTGGTACCTACATG  
PKD1P3 ACAGCGGATGTAAACTACATCGTCATGCTGACATGTGCTGTGTGCCTGGTACCTACATG  
PKD1P6 ACAGCGGATGTAAACTACATCGTCATGCTGACATGTGCTGTGTGCCTGGTACCTACATG  
\*\*\*\*\*

PKD1P2 GTCATGGCCGCCATCCTGCACAAGCTGGACCAGTTGGATGCCAGCCGGGGCTGGCCATC  
PKD1P5 GTCATGGCCGCCATCCTGCACAAGCTGGACCAGTTGGATGCCAGCCGGGGCTGGCCATC  
PKD1 GTCATGGCCGCCATCCTGCACAAGCTGGACCAGTTGGATGCCAGCCGGGGCTGGCCATC  
PKD1P4 GTCATGGCCGCCATCCTGCACAAGCTGGACCAGTTGGATGCCAGCCGGGGCTGGCCATC  
PKD1P1 GTCATGGCCGCCATCCTGCACAAGCTGGACCAGTTGGATGCCAGCCGGGGCTGGCCATC  
PKD1P3 GTCATGGCCGCCATCCTGCACAAGCTGGACCAGTTGGATGCCAGCCGGGGCTGGCCATC  
PKD1P6 GTCATGGCCGCCATCCTGCACAAGCTGGACCAGTTGGATGCCAGCCGGGGCTGGCCATC  
\*\*\*\*\*

PKD1P2 CCCTTCTGTGGGCAGCGGGCCGCTTCAAGTACGAGATCCTCGTCAAGACAGGCTGGGGC  
PKD1P5 CCCTTCTGTGGGCAGCGGGCCGCTTCAAGTACGAGATCCTCGTCAAGACAGGCTGGGGC  
PKD1 CCCTTCTGTGGGCAGCGGGCCGCTTCAAGTACGAGATCCTCGTCAAGACAGGCTGGGGC  
PKD1P4 CCCTTCTGTGGGCAGCGGGCCGCTTCAAGTACGAGATCCTCGTCAAGACAGGCTGGGGC  
PKD1P1 CCCTTCTGTGGGCAGCGGGCCGCTTCAAGTACGAGATCCTCGTCAAGACAGGCTGGGGC  
PKD1P3 CCCTTCTGTGGGCAGCGGGCCGCTTCAAGTACGAGATCCTCGTCAAGACAGGCTGGGGC  
PKD1P6 CCCTTCTGTGGGCAGCGGGCCGCTTCAAGTACGAGATCCTCGTCAAGACAGGCTGGGGC  
\*\* \*\*\*\*\*

PKD1P2 CGGGGCTCAGGTACCACGGCCACGTGGGCATCATGCTGTATGGGGTGGACAGCCGGAGT  
PKD1P5 CGGGGCTCAGGTACCACGGCCACGTGGGCATCATGCTGTATGGGGTGGACAGCCGGAGC  
PKD1 CGGGGCTCAGGTACCACGGCCACGTGGGCATCATGCTGTATGGGGTGGACAGCCGGAGC  
PKD1P4 CGGGGCTCAGGTACCACGGCCACGTGGGCATCATGCTGTATGGGGTGGACAGCCGGAGC  
PKD1P1 CGGGGCTCAGGTACCACGGCCACGTGGGCATCATGCTGTATGGGGTGGACAGCCGGAGC  
PKD1P3 CGGGGCTCAGGTACCACGGCCACGTGGGCATCATGCTGTATGGGGTGGACAGCCGGAGC  
PKD1P6 CGGGGCTCAGGTACCACGGCCACGTGGGCATCATGCTGTATGGGGTGGACAGCCGGAGC  
\*\*\*\*\*

**c. 9448**

PKD1P2 .  
PKD1P5 **G**GCCACCGGCACCTGGACGGCGACAGAGCCTTCCACCGCAACAGTCTGGACATCTTCCGG  
PKD1 **G**GCCACCGGCACCTGGACGGCGACAGAGCCTTCCACCGCAACAGTCTGGACATCTTCCAG  
PKD1P4 **G**GCCACCGGCACCTGGACGGCGACAGAGCCTTCCACCGCAACAGTCTGGACATCTTCCGG  
PKD1P1 **G**GCCACCGGCACCTGGACGGCGACAGAGCCTTCCACCGCAACAGTCTGGACATCTTCCAG  
PKD1P3 **G**GCCACCGGCACCTGGACGGCGACAGAGCCTTCCACCGCAACAGTCTGGACATCTTCCAG  
PKD1P6 **G**GCCACCGGCACCTGGATGGCGACAGAGCCTTCCACCGCAACAGCCTGGACATCTTCCGG  
\*\*\*\*\*

PKD1P2 ATCGCCACCCCGCACAGCCTGGGTAGCGTGTGGAAGATCCGAGTGTGGCAGCACAACAAA  
PKD1P5 ATCGCCACCCCGCACAGCCTGGGTAGCGTGTGGAAGATCCGAGTGTGGCAGCACAACAAA  
PKD1 ATCGCCACCCCGCACAGCCTGGGTAGCGTGTGGAAGATCCGAGTGTGGCAGCACAACAAA  
PKD1P4 ATCGCCACCCCGCACAGCCTGGGTAGCGTGTGGAAGATCCGAGTGTGGCAGCACAACAAA  
PKD1P1 ATCGCCACCCCGCACAGCCTGGGTAGCGTGTGGAAGATCCGAGTGTGGCAGCACAACAAA  
PKD1P3 ATCGCCACCCCGCACAGCCTGGGTAGCGTGTGGAAGATCCGAGTGTGGCAGCACAACAAA  
PKD1P6 ATCGCCACCCCGCACAGCCTGGGTAGCGTGTGGAAGATCCGAGTGTGGCAGCACA--AA  
\*\*\*\*\*

PKD1P2 GGGCTCAGCCCTGCCTGGTTCTGCAGCACATCATCGTCAGGGACCTGCAGACGGCACGC  
PKD1P5 GGGCTCAGCCCTGCCTGGTTCTGCAGCACATCATCGTCAGGGACCTGCAGACGGCACGC

PKD1 GGGCTCAGCCCTGCCTGGTTCTGCAGCACATCATCGTCAGGGACCTGCAGACGGCACGC  
PKD1P4 GGGCTCAGCCCTGCCTGGTTCTGCAGCACATCATCGTCAGGGACCTGCAGACGGCACGC  
PKD1P1 GGGCTCAGCCCTGCCTGGTTCTGCAGCACATCATCGTCAGGGACCTGCAGACGGCACGC  
PKD1P3 GGGCTCAGCCCTGCCTGGTTCTGCAGCACATCATCGTCAGGGACCTGCAGACGGCACGC  
PKD1P6 GGGCTCAGCCCTGCCTGGTTCTGCAGCACATCATCGTCAGGGACCTGCAGACGGCACAC  
\*\*\*\*\*

PKD1P2 AGCACCTTCTTCTGGTCAATGACTGGCTTTCGGTGGAGACGGAGCCAACGGGGCCTG  
PKD1P5 AGCACCTTCTTCTGGTCAATGACTGGCTTTCGGTGGAGACGGAGCCAACGGGGCCTG  
PKD1 AGCGCCTTCTTCTGGTCAATGACTGGCTTTCGGTGGAGACGGAGCCAACGGGGCCTG  
PKD1P4 AGCACCTTCTTCTGGTCAATGACTGGCTTTCGGTGGAGACGGAGCCAACGGGGCCTG  
PKD1P1 AGCACCTTCTTCTGGTCAATGACTGGCTTTCGGTGGAGACGGAGCCAACGGGGCCTG  
PKD1P3 AGCACCTTCTTCTGGTCAATGACTGGCTTTCGGTGGAGACGGAGCCAACGGGGCCTG  
PKD1P6 AGCACCTTCTTCTGGTCAATGACTGGCTTTCGGTGGAGACGGAGCCAACGGGGCCTG  
\*\*\* \*\*\*\*\*

PKD1P2 GTGGAGAAGGAGGTGCTGGCTGCGAGTCACGCAGCCCTGTTGCGCTTCCGGCGCCTGCTG  
PKD1P5 GTGGAGAAGGAGGTGCTGGCCGCGAGTCACGCAGCCCTGTTGCGCTTCCGGCGCCTGCTG  
PKD1 GTGGAGAAGGAGGTGCTGGCCGCGAGTCACGCAGCCCTTTTGGCGCTTCCGGCGCCTGCTG  
PKD1P4 GTGGAGAAGGAGGTGCTGGCTGCGAGTCACGCAGCCCTGTTGCGCTTCCGGCGCCTGCTG  
PKD1P1 GTGGAGAAGGAGGTGCTGGCCGCGAGTCACGCAGCCCTGTTGCGCTTCCGGCGCCTGCTG  
PKD1P3 GTGGAGAAGGAGGTGCTGGCCGCGAGTCACGCAGCCCTGTTGCGCTTCCGGCGCCTGCTG  
PKD1P6 GTGGAGAAGGAGGTGCTGGCCGCGAGTCACGCAGCCCTGTTGCGCTTCCGGCGCCTGCTG  
\*\*\*\*\*

PKD1P2 GTGGCTGAGCTGCAGCGTGGCTTCTTTGACAAGCACATCTGGCTCTCCATATGGGACCGG  
PKD1P5 GTGGCTGAGCTGCAGCGTGGCTTCTTTGACAAGCACATCTGGCTCTCCATATGGGACCGG  
PKD1 GTGGCTGAGCTGCAGCGTGGCTTCTTTGACAAGCACATCTGGCTCTCCATATGGGACCGG  
PKD1P4 GTGGCTGAGCTGCAGCGTGGCTTCTTTGACAAGCACATCTGGCTCTCCATATGGGACCGG  
PKD1P1 GTGGCTGAGCTGCAGCGTGGCTTCTTTGACAAGCACATCTGGCTCTCCATATGGGACCGG  
PKD1P3 GTGGCTGAGCTGCAGCGTGGCTTCTTTGACAAGCACATCTGGCTCTCCATATGGGACCGG  
PKD1P6 GTGGCTGAGCTGCAGTGGCGCTTCTTTGACAAGCACATCTGGCTCTCCATATGGGACCGG  
\*\*\*\*\*

PKD1P2 CCACCTCGTAGCTGTTTCACTCGCATCCAGAGGGCCACCTGCTGCGTTCTCCTCATCTGC  
PKD1P5 CCGCCTCGTAGCTGTTTCACTCGCATCCAGAGGGCCACCTGCTGCGTTCTCCTCATCTGT  
PKD1 CCGCCTCGTAGCCTGTTTCACTCGCATCCAGAGGGCCACCTGCTGCGTTCTCCTCATCTGC  
PKD1P4 CCACCTCGTAGCTGTTTCACTCGCATCCAGAGGGCCACCTGCTGCGTTCTCCTCATCTGC  
PKD1P1 CCGCCTCGTAGCTGTTTCACTCGCATCCAGAGGGCCACCTGCTGCGTTCTCCTCATCTGT  
PKD1P3 CCGCCTCGTAGCTGTTTCACTCGCATCCAGAGGGCCACCTGCTGCGTTCTCCTCATCTGT  
PKD1P6 CCGCCTCGTAGCTGTTTCACTCGCATCCAGAGGGCCACCTGCTGCGTTCTCCTCATCTGC  
\*\* \*\*\*\*\*

**c. 9889**

PKD1P2 CTCTTCTGGGGCCCAACGCC**G**TGTGGTACGGGGCTGTTGGTACTCTGCCTACAGCACG  
PKD1P5 CTCTTCTGGGGCCCAACGCC**G**TGTGGTACGGGGCTGTTGGAGACTCTGCCTACAGCACG  
PKD1 CTCTTCTGGGGCCCAACGCC**G**TGTGGTACGGGGCTGTTGGGACTCTGCCTACAGCACG  
PKD1P4 CTCTTCTGGGGCCCAACGCC**G**TGTGGTACGGGGCTGTTGGTACTCTGCCTACAGCACG



PKD1P1 CTCTTCCTGGGCGCCAACGCCGTGTGGTACGGGGCTGTTGGAGACTCTGCCTACAGCAG  
PKD1P3 CTCTTCCTGGGCGCCAACGCCGTGTGGTACGGGGCTGTTGGAGACTCTGCCTACAGCAGC  
PKD1P6 CTCTTCCTGGGCGCCAACGCCGTGTGGTACGGGGCTGTTGGTACTCTGCCTACAGCAG  
\*\*\*\*\*

PKD1P2 GGGCATGTGTCCAGGCTGAGCCCGCTGAGCGTCGACACAGTCGCTGTTGGCCTGGTGTCC  
PKD1P5 GGGCGTGTGTCCAGGCTGAACCCGCTGAGCGTCGACACAGTCGCTGTTGGCCTGGTGTCC  
PKD1 GGGCATGTGTGTCCAGGCTGAGCCCGCTGAGCGTCGACACAGTCGCTGTTGGCCTGGTGTCC  
PKD1P4 GGGCATGTGTGTCCAGGCTGAGCCCGCTGAGCGTCGACACAGTCGCTGTTGGCCTGGTGTCC  
PKD1P1 GGGCGTGTGTCCAGGCTGAACCCGCTGAGCGTCGACACAGTCGCTGTTGGCCTGGTGTCC  
PKD1P3 GGGCGTGTGTGTCCAGGCTGAACCCGCTGAGCGTCGACACAGTCGCTGTTGGCCTGGTGTCC  
PKD1P6 GGGCATGTGTGTCCAGGCTGAGCCCGCTGAGCGTCGACACAGTCGCTGTTGGCCTGGTGTCC  
\*\*\*\*

PKD1P2 AGCGTGGTTGTCTATCCCGTCTACCTGGCCATCCTCTTTCTCTTCCGGATGTCCCGGAGC  
PKD1P5 AGCGTGGTTGTCTATCCCGTCTACCTGGCCATCCTCTTTCTCTTCCGGATGTCCCGGAGC  
PKD1 AGCGTGGTTGTCTATCCCGTCTACCTGGCCATCCTCTTTCTCTTCCGGATGTCCCGGAGC  
PKD1P4 AGCGTGGTTGTCTATCCCGTCTACCTGGCCATCCTCTTTCTCTTCCGGATGTCCCGGAGC  
PKD1P1 AGCGTGGTTGTCTATCCCGTCTACCTGGCCATCCTCTTTCTCTTCCGGATGTCCCGGAGC  
PKD1P3 AGCGTGGTTGTCTATCCCGTCTACCTGGCCATCCTCTTTCTCTTCCGGATGTCCCGGAGC  
PKD1P6 AGCGTGGTTGTCTATCCCGTCTACCTGGCCATCCTCTTTCTCTTCCGGATGTCCCGGAGC  
\*\*\*\*\*

PKD1P2 AAGGTGGCTGGGAGCCTGAGCCCCACACCTGCCGGGCAGTAGGTGCTGGACATCGACAGC  
PKD1P5 AAGGTGGCTGGGAGCCTGAGCCCCACACCTGCCGGGCAGTAGGTGCTGGACATCGACAGC  
PKD1 AAGGTGGCTGGGAGCCTGAGCCCCACACCTGCCGGGCAGTAGGTGCTGGACATCGACAGC  
PKD1P4 AAGGTGGCTGGGAGCCTGAGCCCCACACCTGCCGGGCAGTAGGTGCTGGACATCGACAGC  
PKD1P1 AAGGTGGCTGGGAGCCTGAGCCCCACACCTGCCGGGCAGTAGGTGCTGGACATCGACAGC  
PKD1P3 AAGGTGGCTGGGAGCCTGAGCCCCACACCTGCCGGGCAGTAGGTGCTGGACATCGACAGC  
PKD1P6 AAGGTGGCTGGGAGCCTGAGCCCCACACCTGCCGGGCAGTAGGTGCTGGACATCGACAGC  
\*\*\*\*\*

PKD1P2 TGCCTGGACTCGTCCGTGCTGGACAGCTCCTTCCTCACGTTCTCAGGCCTCCACGCTGAG  
PKD1P5 TGCCTGGACTCATCCGTGCTGGACAGCTCCTTCCTCACGTTCTCAGGCCTCCACGCTGAG  
PKD1 TGCCTGGACTCGTCCGTGCTGGACAGCTCCTTCCTCACGTTCTCAGGCCTCCACGCTGAG  
PKD1P4 TGCCTGGACTCATCCGTGCTGGACAGCTCCTTCCTCACGTTCTCAGGCCTCCACGCTGAG  
PKD1P1 TGCCTGGACTCATCCGTGCTGGACAGCTCCTTCCTCACGTTCTCAGGCCTCCACGCTGAG  
PKD1P3 TGCCTGGACTCATCCGTGCTGGACAGCTCCTTCCTCACGTTCTCAGGCCTCCACGCTGAG  
PKD1P6 TGCCTGGACTCATCCGTGCTGGACAGCTCCTTCCTCACGTTCTCAGGCCTCCACGCTGAG  
\*\*\*\*\*

PKD1P2 -----GCCTTTGCTGGACAGGTGAAGAGTGACTTGTTTCTGGAT  
PKD1P5 C-----AGGCCTTTGCTGGACAGATGAAGAGTGACTTGTTTCTGGAT  
PKD1 C-----AGGCCTTTGCTGGACAGATGAAGAGTGACTTGTTTCTGGAT  
PKD1P4 -----GCCTTTGCTGGACAGGTGAAGAGTGACTTGTTTCTGGAT  
PKD1P1 ACCCTGTGCACCTCTCAGCAGCCCTTTGCTGGACAGATGAAGAGTGACTTGTTTCTGGAT  
PKD1P3 C-----AGGCCTTTGCTGGACAGATGAAGAGTGACTTGTTTCTGGAT  
PKD1P6 -----GCCTTTGCTGGACAGGTGAAGAGTGACTTGTTTCTGGAT  
\*\*\*\*\*

c.10231

PKD1P2 GATTCTAAGAGTCTGGTGTGCTGGCCTCCAGCGAGGGAACGCCAGTTGGCCGGACCTG  
PKD1P5 GATTCTAAGAGTCTGGTGTGCTGGCCTCCAGCGAGGGAACGCCAGTTGGCCGGACCTG  
PKD1 GATTCTAAGAGTCTGGTGTGCTGGCCTCCAGCGAGGGAACGCCAGTTGGCCGGACCTG  
PKD1P4 GATTCTAAGAGTCTGGTGTGCTGGCCTCCAGCGAGGGAACGCCAGTTGGCCGGACCTG  
PKD1P1 GATTCTAAGAGTCTGGTGTGCTGGCCTCCAGCGAGGGAACGCCAGTTGGCCGGACCTG  
PKD1P3 GATTCTAAGAGTCTGGTGTGCTGGCCTCCAGCGAGGGAACGCCAGTTAGCCGGACCTG  
PKD1P6 GATTCTAAGAGTCTGGTGTGCTGGCCTCCAGCGAGGGAACGCCAGTTGGCCGGACCTG  
\*\*\*\*\*

PKD1P2 CTCAGTGACCCGTCCATTGTGGGTAGCAATCTGCGGCA-----  
PKD1P5 CTCAGTGACCCGTCCATTGTGGGTAGCAATCTGCGGCA-----  
PKD1 CTCAGTGACCCGTCCATTGTGGGTAGCAATCTGCGGCA-----  
PKD1P4 CTCAGTGACCCGTCCATTGTGGGTAGCAATCTGCGGCA-----  
PKD1P1 CTCAGTGACCCGTCCATTGTGGGTAGCAATCTG-----  
PKD1P3 CTCAGTGACCCGTCCATTGTGGGTAGCAATCTGCGGCA-----  
PKD1P6 CTCAGTGACCCGTCCATTGTGGGTAGCAATCTGCG-----  
\*\*\*\*\*

PKD1P2 -----  
PKD1P5 -----  
PKD1 CATGGGCTGGGCCAGAGGAGGACGGCTTCTCCCTGGCCAGCCCCACTCGCCTGCCAAA  
PKD1P4 -----  
PKD1P1 -----  
PKD1P3 -----  
PKD1P6 -----

PKD1P2 -----  
PKD1P5 -----  
PKD1 TCCTTCTCAGCATCAGATGAAGACCTGATCCAGCAGGTCTTGGCAGGGGGTCAGCAGC  
PKD1P4 -----  
PKD1P1 -----  
PKD1P3 -----  
PKD1P6 -----

PKD1P2 -----  
PKD1P5 -----  
PKD1 CCAGCCCTACCCAAGACCCACATGGAAACGGACCTGCTCAGCAGCCTGTCCAGCACT  
PKD1P4 -----  
PKD1P1 -----

PKD1P3 -----  
PKD1P6 -----

PKD1P2 -----  
PKD1P5 -----  
PKD1 CCTGGGGAGAAGACAGAGACGCTGGCGCTGCAGAGGCTGGGGGAGCTGGGGCCACCCAGC  
PKD1P4 -----  
PKD1P1 -----  
PKD1P3 -----  
PKD1P6 -----

PKD1P2 -----  
PKD1P5 -----  
PKD1 CCAGGCCTGAACTGGGAACAGCCCCAGGCAGCGAGGCTGTCCAGGACAGGACTGGTGGAG  
PKD1P4 -----  
PKD1P1 -----  
PKD1P3 -----  
PKD1P6 -----

PKD1P2 -----  
PKD1P5 -----  
PKD1 GGTCTGCGGAAGCGCCTGCTGCCGGCCTGGTGTGCCTCCCTGGCCACGGGCTCAGCCTG  
PKD1P4 -----  
PKD1P1 -----  
PKD1P3 -----  
PKD1P6 -----

PKD1P2 -----  
PKD1P5 -----  
PKD1 CTCCTGGTGGCTGTGGCTGTGGCTGTCTCAGGGTGGGTGGGTGCGAGCTTCCCCCGGGC  
PKD1P4 -----  
PKD1P1 -----  
PKD1P3 -----  
PKD1P6 -----

PKD1P2 -----  
PKD1P5 -----  
PKD1 GTGAGTGTTGCGTGGCTCCTGTCCAGCAGCGCCAGCTTCTGGCCTCATTCCTGGCTGG  
PKD1P4 -----  
PKD1P1 -----  
PKD1P3 -----  
PKD1P6 -----

PKD1P2 -----  
PKD1P5 -----  
PKD1 GAGCCACTGAAGGTCTTGCTGGAAGCCCTGTACTTCTCACTGGTGGCCAAGCGGCTGCAC  
PKD1P4 -----  
PKD1P1 -----  
PKD1P3 -----  
PKD1P6 -----

PKD1P2 -----  
PKD1P5 -----  
PKD1 CCGGATGAAGATGACACCCTGGTAGAGAGCCCGGCTGTGACGCCTGTGAGCGCACGTGTG  
PKD1P4 -----  
PKD1P1 -----  
PKD1P3 -----  
PKD1P6 -----

PKD1P2 -----  
PKD1P5 -----  
PKD1 CCCCCGTACGGCCACCCACGGCTTTGCACTCTTCTCGGCCAAGGAAGAAGCCCCGAAG  
PKD1P4 -----  
PKD1P1 -----  
PKD1P3 -----  
PKD1P6 -----

PKD1P2 -----  
PKD1P5 -----  
PKD1 GTCAAGAGGCTACATGGCATGCTGCGGAGCCTCCTGGTGTACATGCTTTTTCTGCTGGTG  
PKD1P4 -----  
PKD1P1 -----  
PKD1P3 -----  
PKD1P6 -----

PKD1P2 -----  
PKD1P5 -----  
PKD1 ACCCTGCTGGCCAGCTATGGGGATGCCTCATGCCATGGGCACGCCTACCGTCTGCAAAGC  
PKD1P4 -----  
PKD1P1 -----  
PKD1P3 -----  
PKD1P6 -----

PKD1P2 -----  
PKD1P5 -----  
PKD1 GCCATCAAGCAGGAGCTGCACAGCCGGGCCTTCTGGCCATCACGGGTCTGAGGAGCTC  
PKD1P4 -----

PKD1P1  
PKD1P3  
PKD1P6

PKD1P2  
PKD1P5  
PKD1  
TGGCCATGGATGGCCCACGTGCTGCTGCCCTACGTCCACGGGAACCAGTCCAGCCCAGAG  
PKD1P4  
PKD1P1  
PKD1P3  
PKD1P6

PKD1P2  
PKD1P5  
PKD1  
CTGGGGCCCCACGGCTGCGGCAGGTGCGGCTGCAGGAAGCACTCTACCCAGACCCCTCCC  
PKD1P4  
PKD1P1  
PKD1P3  
PKD1P6

PKD1P2  
PKD1P5  
PKD1  
GGCCCCAGGGTCCACACGTGCTCGGCCGAGGAGGCTTCAGCACCAGCGATTACGACGTT  
PKD1P4  
PKD1P1  
PKD1P3  
PKD1P6

PKD1P2  
PKD1P5  
PKD1  
GGCTGGGAGAGTCCACAAATGGCTCGGGGACGTGGGCCTATTGAGCGCCGGATCTGCTG  
PKD1P4  
PKD1P1  
PKD1P3  
PKD1P6

PKD1P2  
PKD1P5  
PKD1  
GGGGCATGGTCCCTGGGGCTCCTGTGCCGTGTATGACAGCGGGGGCTACGTGCAGGAGCTG  
PKD1P4  
PKD1P1  
PKD1P3  
PKD1P6

PKD1P2  
PKD1P5  
PKD1  
GGCCTGAGCCTGGAGGAGAGCCGCGACCGGCTGCGCTTCCTGCAGCTGCACAACCTGGCTG  
PKD1P4  
PKD1P1  
PKD1P3  
PKD1P6

PKD1P2  
PKD1P5  
PKD1  
GACAACAGGAGCCGCGCTGTGTTTCCTGGAGCTCACGCGCTACAGCCCGGCCGTGGGGCTG  
PKD1P4  
PKD1P1  
PKD1P3  
PKD1P6

PKD1P2  
PKD1P5  
PKD1  
CACGCCGCCGTACGCTGCGCCTCGAGTTCCTGGGCGCCGCGCCCTGGCCGCCCTC  
PKD1P4  
PKD1P1  
PKD1P3  
PKD1P6

PKD1P2  
PKD1P5  
PKD1  
AGCGTCCGCCCTTTGCGCTGCGCCGCTCAGCGCGGGCCTCTCGCTGCCTCTGCTCACC  
PKD1P4  
PKD1P1  
PKD1P3  
PKD1P6

PKD1P2  
PKD1P5  
PKD1  
TCGGTGTGCCTGCTGCTGTTCCCGGTGCACTTCGCCGTGGCCGAGGCCCGTACTTGGCAC  
PKD1P4  
PKD1P1  
PKD1P3  
PKD1P6

PKD1P2  
PKD1P5  
PKD1  
AGGGAAGGGCGCTGGCGCGTGTGCGGCTCGGAGCCTGGGCGGGTGGCTGCTGGTGGCG

PKD1P4  
PKD1P1  
PKD1P3  
PKD1P6

PKD1P2  
PKD1P5  
PKD1  
PKD1P4  
PKD1P1  
PKD1P3  
PKD1P6

PKD1P2  
PKD1P5

-----  
-----  
GCCATCCTGCTCGTGTCTTCTCTGTGTGGACTCCCTCTGGAGCGTGGCCCAGGCCCTGTTG  
-----  
-----

-----  
-----  
GTGCTGTGCCCTGGGACTGGGCTCTTACCCTGTGTCTGCGGAGTCTGGCACCTGTCA  
-----  
-----

-----  
-----  
CCCCTGCTGTGTGTGGGGCTCTGGGCACTGCGGCTGTGGGGCGCCCTACGGCTGGGGGCT  
-----  
-----

-----  
-----  
GTTATTCTCCGCTGGCGCTACCACGCCTTGCCTGGAGAGCTGTACCGCCGGCCTGGGAG  
-----  
-----

-----  
-----  
CCCCAGGACTACGAGATGGTGGAGTTGTTCTGCGCAGGCTGCGCCTCTGGATGGGCCTC  
-----  
-----

PKD1 AGCAAGGTCAAGGAGTTCCGCCACAAAGTCCGCTTTGAAGGGATGGAGCCGCTGCCCTCT  
PKD1P4 -----  
PKD1P1 -----  
PKD1P3 -----  
PKD1P6 -----

PKD1P2 -----  
PKD1P5 -----  
PKD1 CGCTCCTCCAGGGGCTCCAAGGTATCCCCGGATGTGCCCCACCCAGCGCTGGCTCCGAT  
PKD1P4 -----  
PKD1P1 -----  
PKD1P3 -----  
PKD1P6 -----

PKD1P2 -----  
PKD1P5 -----  
PKD1 GCCTCGCACCCCTCCACCTCCTCCAGCCAGCTGGATGGGCTGAGCGTGAGCCTGGGCCGG  
PKD1P4 -----  
PKD1P1 -----  
PKD1P3 -----  
PKD1P6 -----

PKD1P2 -----  
PKD1P5 -----  
PKD1 CTGGGGACAAGGTGTGAGCCTGAGCCCTCCCGCCTCCAAGCCGTGTTGAGGCCCTGCTC  
PKD1P4 -----  
PKD1P1 -----  
PKD1P3 -----  
PKD1P6 -----

PKD1P2 -----  
PKD1P5 -----  
PKD1 ACCCAGTTTGACCGACTCAACCAGGCCACAGAGGACGTCTACCAGCTGGAGCAGCAGCTG  
PKD1P4 -----  
PKD1P1 -----  
PKD1P3 -----  
PKD1P6 -----

PKD1P2 -----  
PKD1P5 -----  
PKD1 CACAGCCTGCAAGGCCGAGGAGCAGCCGGGCGCCCGCGGATCTTCCCGTGGCCCATCC  
PKD1P4 -----  
PKD1P1 -----  
PKD1P3 -----

PKD1P6 -----

PKD1P2 -----  
PKD1P5 -----  
PKD1 CCGGGCCTGCGGCCAGCACTGCCAGCCGCTTGCCCCGGGCCAGTCGGGGTGTGGACCTG  
PKD1P4 -----  
PKD1P1 -----  
PKD1P3 -----  
PKD1P6 -----

PKD1P2 -----  
PKD1P5 -----  
PKD1 GCCACTGGCCCCAGCAGGACACCCCTTCGGGCCAAGAACAAGGTCCACCCAGCAGCACT  
PKD1P4 -----  
PKD1P1 -----  
PKD1P3 -----  
PKD1P6 -----

PKD1P2 -----  
PKD1P5 -----  
PKD1 TAGTCCTCCTTCTGCGGGGGTGGGCCGTGGAGTCGGAGTGGACACCGCTCAGTATTAC  
PKD1P4 -----  
PKD1P1 -----  
PKD1P3 -----  
PKD1P6 -----

PKD1P2 -----  
PKD1P5 -----  
PKD1 TTTCTGCCGCTGTCAAGGCCGAGGGCCAGGCAGAATGGCTGCACGTAGGTCCCCAGAGA  
PKD1P4 -----  
PKD1P1 -----  
PKD1P3 -----  
PKD1P6 -----

PKD1P2 -----  
PKD1P5 -----  
PKD1 GCAGGCAGGGGCATCTGTCTGTCTGTGGGCTTCAGCACTTTAAAGAGGCTGTGTGGCCAA  
PKD1P4 -----  
PKD1P1 -----  
PKD1P3 -----  
PKD1P6 -----

PKD1P2 -----

PKD1P5 -----  
PKD1 CCAGGACCCAGGGTCCCCTCCCCAGCTCCCTTGGGAAGGACACAGCAGTATTGGACGGTT  
PKD1P4 -----  
PKD1P1 -----  
PKD1P3 -----  
PKD1P6 -----

PKD1P2 -----  
PKD1P5 -----  
PKD1 TCTAGCCTCTGAGATGCTAATTTATTTCCCCGAGTCCCTCAGGTACAGCGGGCTGTGCCCG  
PKD1P4 -----  
PKD1P1 -----  
PKD1P3 -----  
PKD1P6 -----

PKD1P2 -----  
PKD1P5 -----  
PKD1 GCCCCACCCCTGGGCAGATGTCCCCACTGCTAAGGCTGCTGGCTTCAGGGAGGGTTAG  
PKD1P4 -----  
PKD1P1 -----  
PKD1P3 -----  
PKD1P6 -----

PKD1P2 -----  
PKD1P5 -----  
PKD1 CCTGCACCGCCGCCACCCTGCCCTAAGTTATTACCTCTCCAGTTCCTACCGTACTCCCT  
PKD1P4 -----  
PKD1P1 -----  
PKD1P3 -----  
PKD1P6 -----

PKD1P2 -----  
PKD1P5 -----  
PKD1 GCACCGTCTCACTGTGTGCTCGTGTGTCAGTAATTTATATGGTGTAAATGTGTATATTT  
PKD1P4 -----  
PKD1P1 -----  
PKD1P3 -----  
PKD1P6 -----

PKD1P2 -----  
PKD1P5 -----  
PKD1 TTGTATGTCACTATTTTCACTAGGGCTGAGGGGCTGCGCCCAGAGCTGGCCTCCCCAA  
PKD1P4 -----  
PKD1P1 -----

PKD1P3 -----  
PKD1P6 -----

PKD1P2 -----  
PKD1P5 -----  
PKD1 CACCTGCTGCGCTTGGTAGGTGTGGTGGCGTTATGGCAGCCCGGCTGCTGCTGGATGCG  
PKD1P4 -----  
PKD1P1 -----  
PKD1P3 -----  
PKD1P6 -----

PKD1P2 -----  
PKD1P5 -----  
PKD1 AGCTTGGCCTTGGGCCGGTGTGGGGGCACAGCTGTCTGCCAGGCACTCTCATCACCCCA  
PKD1P4 -----  
PKD1P1 -----  
PKD1P3 -----  
PKD1P6 -----

PKD1P2 -----  
PKD1P5 -----  
PKD1 GAGGCCTTGTTCATCCTCCCTTGCCCCAGGCCAGGTAGCAAGAGAGCAGCGCCAGGCCTG  
PKD1P4 -----  
PKD1P1 -----  
PKD1P3 -----  
PKD1P6 -----

PKD1P2 -----  
PKD1P5 -----  
PKD1 CTGGCATCAGGTCTGGGCAAGTAGCAGGACTAGGCATGTGAGAGGACCCAGGGTGGTTA  
PKD1P4 -----  
PKD1P1 -----  
PKD1P3 -----  
PKD1P6 -----

PKD1P2 -----  
PKD1P5 -----  
PKD1 GAGGAAAAGACTCCTCCTGGGGGCTGGCTCCCAGGGTGGAGGAAGGTGACTGTGTGTGTG  
PKD1P4 -----  
PKD1P1 -----  
PKD1P3 -----  
PKD1P6 -----

PKD1P2 -----  
PKD1P5 -----  
PKD1 TGTGTGTGCGCGCGGCACGCGGAGTGTGCTGTATGGCCCAGGCAGCCTCAAGGCCCTC  
PKD1P4 -----  
PKD1P1 -----  
PKD1P3 -----  
PKD1P6 -----

PKD1P2 -----  
PKD1P5 -----  
PKD1 GGAGCTGGCTGTGCCTGCTTCTGTGTACCACTTCTGTGGGCATGGCCGCTTCTAGAGCCT  
PKD1P4 -----  
PKD1P1 -----  
PKD1P3 -----  
PKD1P6 -----

PKD1P2 -----  
PKD1P5 -----  
PKD1 CGACACCCCCCAACCCCGCACCAAGCAGACAAAGTCAATAAAAAGAGCTGTCTGACTGC  
PKD1P4 -----  
PKD1P1 -----  
PKD1P3 -----  
PKD1P6 -----

PKD1P2 --  
PKD1P5 --  
PKD1 AA  
PKD1P4 --  
PKD1P1 --  
PKD1P3 --  
PKD1P6 --
